# Supplementary material for: In vivo self-assembled siRNA as a modality for combination therapy of ulcerative colitis
Source: PubMed Central journal article supplement (PMC9519883; doi:10.1038/s41467-022-33436-0), 2022-09-28
Supplement: 41467_2022_33436_MOESM1_ESM.pdf [file 41467_2022_33436_MOESM1_ESM.pdf]

1  
2  
3  
4  
5  
6  
7  
8  
9  
10  
11  
12  
13  
14  
15  
16  
17  
18

**Supplementary information for**

***In vivo* self-assembled siRNA as a modality for combination  
therapy of ulcerative colitis**

**(Xinyan Zhou *et al.*)**

**This file includes:**

Supplementary Figure 1 to Supplementary Figure 28

Supplementary Table 1 to Supplementary Table 3

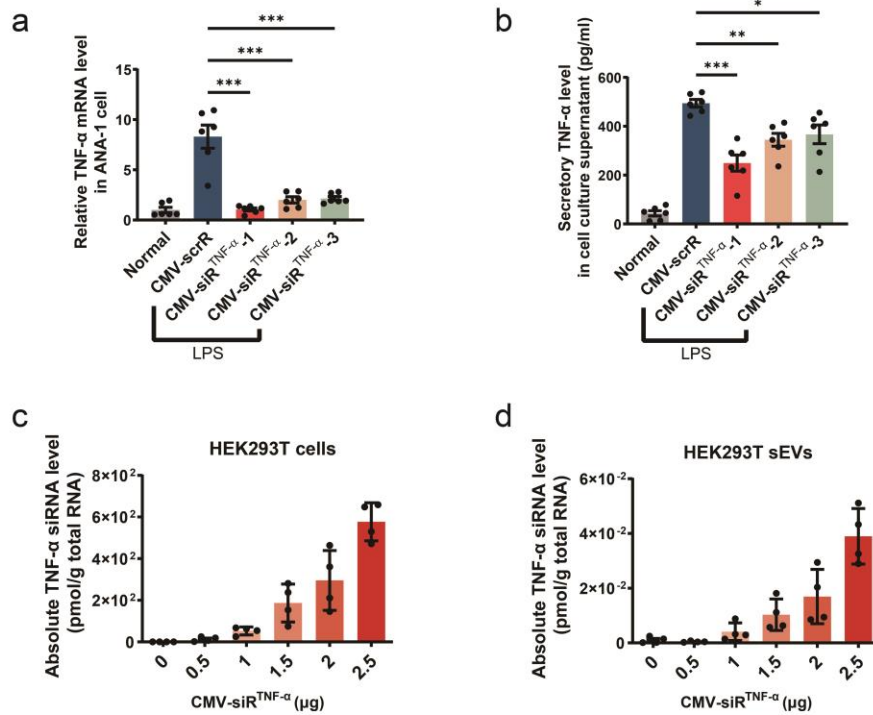

19  
20 **Supplementary Figure 1. Characterisation of the genetic circuits *in vitro*.** (a) ANA-1 cells were  
21 transfected with CMV-scrR or three CMV-siR<sup>TNF-α</sup> circuits. At 24 hours posttransfection, ANA-1  
22 cells were treated with LPS to stimulate an inflammatory response, and quantitative RT-PCR  
23 analysis was performed to measure TNF-α mRNA levels at 48 hours posttransfection (n = 6 in each  
24 group). Untreated cells were used as normal controls. (b) Determination of the levels of secretory  
25 TNF-α protein in cell culture supernatant by ELISA (n = 6 in each group). (c) Quantitative RT-  
26 PCR analysis of TNF-α siRNA levels in HEK293T cells transfected with increasing dose of CMV-  
27 siR<sup>TNF-α</sup> circuit (n = 4 in each group). (d) Quantitative RT-PCR analysis of TNF-α siRNA levels in  
28 the sEVs derived from the culture medium of HEK293T cells transfected with increasing dose of  
29 CMV-siR<sup>TNF-α</sup> circuit (n = 4 in each group). Values are presented as the mean ± SEM. Significance  
30 was determined using one-way ANOVA followed by Dunnett's multiple comparison. \* p < 0.05;  
31 \*\* p < 0.01; \*\*\* p < 0.005.

32  
33  
34  
35

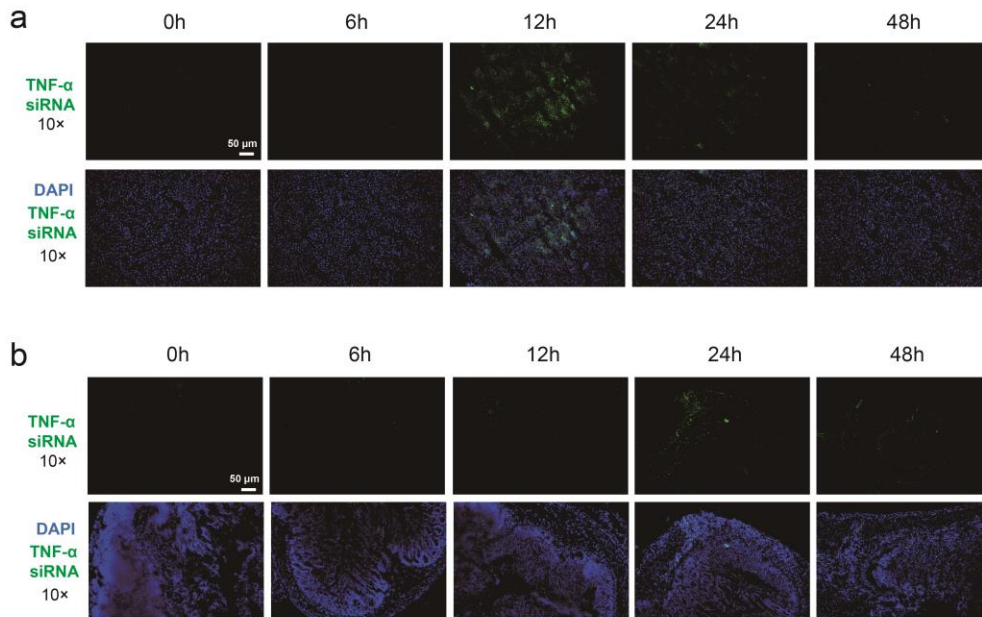

36  
 37 **Supplementary Figure 2. Tracking and visualisation of TNF-α siRNA *in vivo*.** (a and b) *In situ*  
 38 detection of TNF-α siRNA in liver (a) and colon (b) sections of DSS mice at 0, 6, 12, 24 or 48  
 39 hours after injection with the CMV-siR<sup>TNF-α</sup> circuit. Positive *in situ* hybridisation signals are shown  
 40 in green, and DAPI-stained nuclei are shown in blue. Scale bar: 50 μm. Each *in situ* hybridisation  
 41 was repeated independently three times, and representative images are shown.

42  
 43  
 44  
 45  
 46  
 47  
 48  
 49

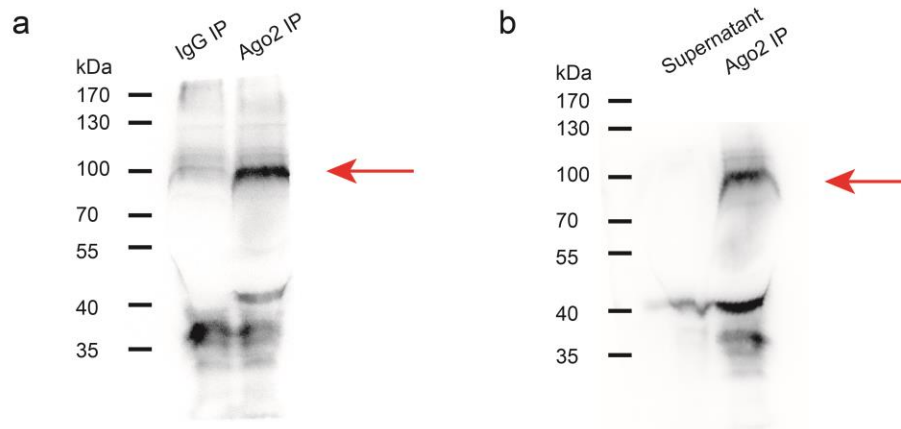

50  
 51 **Supplementary Figure 3. Western blots probed with an anti-Ago2 antibody to assess the Ago2**  
 52 **associated with the captured beads following Ago2 immunoprecipitation.** Bead-conjugated  
 53 anti-Ago2 antibody was incubated with the plasma of CMV-scrR circuit- or CMV-siR<sup>TNF- $\alpha$</sup>  circuit-  
 54 injected mice under native conditions. The beads were separated by centrifuging and processed for  
 55 protein extraction and subsequent Western blotting using a rabbit anti-Ago2 antibody. Total protein  
 56 extracted from the supernatant was also subjected to Western blot analysis to determine the  
 57 amounts of Ago2. The IgG antibody was used as a negative control. **(a)** Red arrow indicating an  
 58 Ago2 band at ~97 kDa in the Ago2 immunoprecipitates but not in the IgG immunoprecipitates. **(b)**  
 59 Red arrow indicating an Ago2 band at ~97 kDa in the Ago2 immunoprecipitates but not in the  
 60 supernatant. Each immunoprecipitation was repeated independently three times, and representative  
 61 images are shown.

62  
 63  
 64

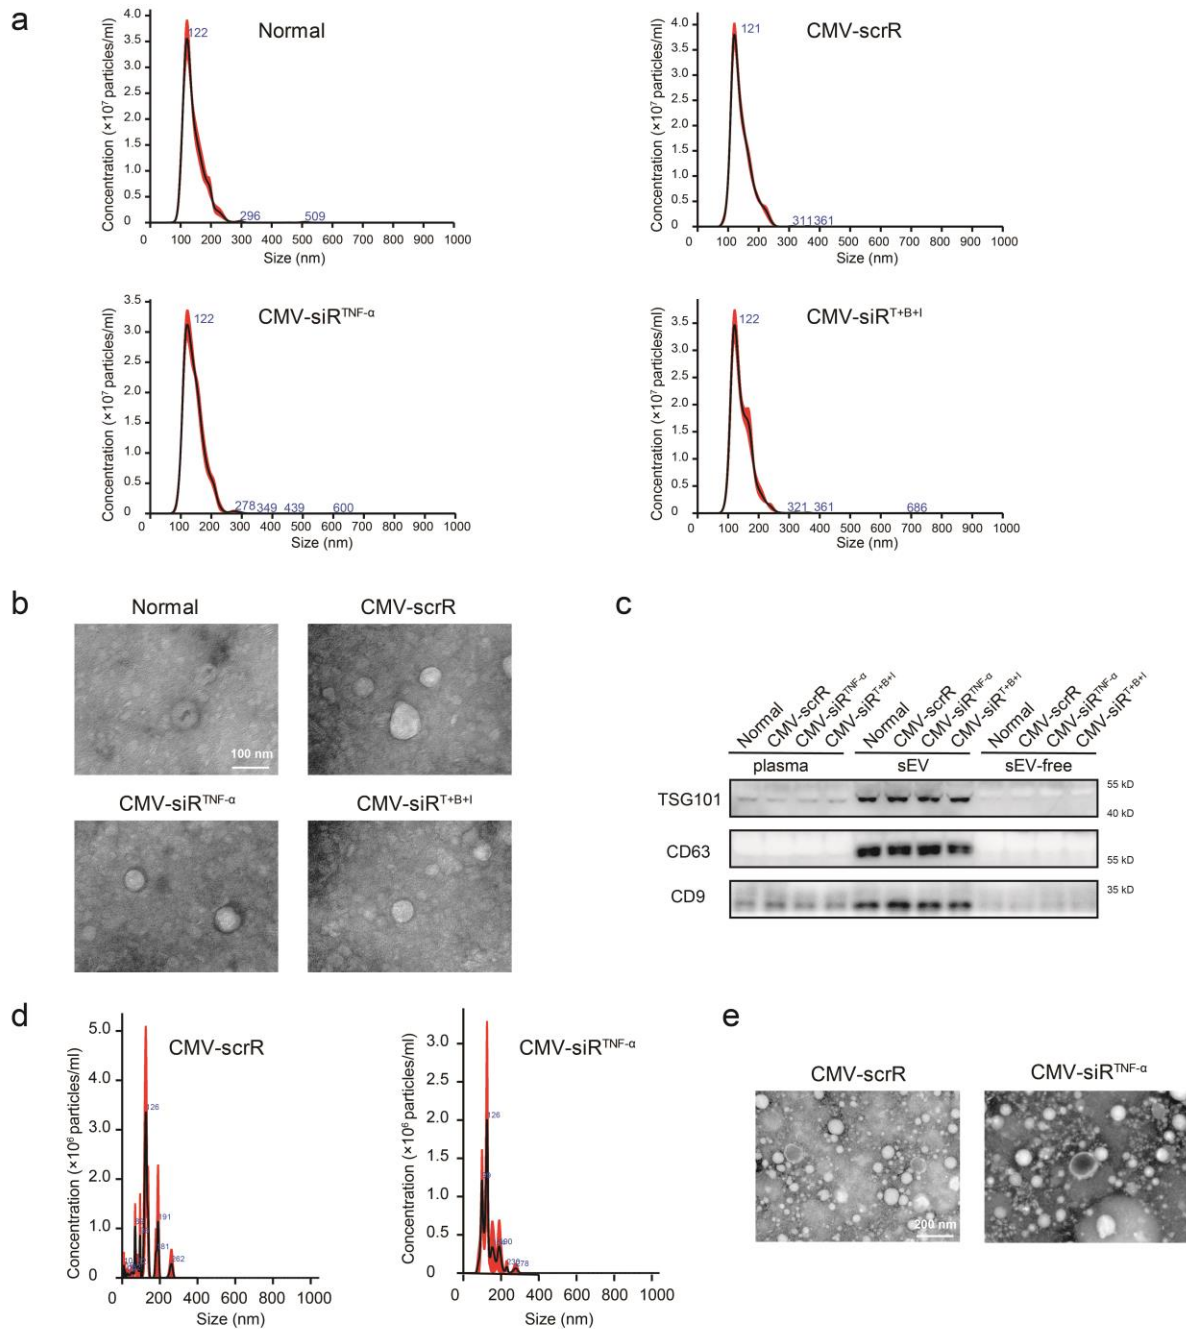

65  
66 **Supplementary Figure 4. Characterisation of the properties of siRNA-encapsulating sEVs.**  
67 BALB/c mice were intravenously injected with 5 mg/kg CMV-scrR, CMV-siR<sup>TNF-α</sup> or CMV-  
68 siR<sup>T+B+I</sup> circuit every day for a total of 7 times, and sEVs were then purified by using commercially  
69 available kit (a-c) or density gradient centrifugation (d and e) from mouse plasma and characterised  
70 using NTA and TEM. The enrichment of sEV markers was analysed by Western blotting. sEVs  
71 derived from untreated BALB/c mice were included as normal controls. **(a)** Size distribution and

72 concentration of purified sEVs determined by NTA. **(b)** Representative TEM images of sEVs.  
73 Scale bar: 100 nm. **(c)** Western blot analysis of specific sEV markers (TSG101, CD63 and CD9)  
74 in whole plasma, purified sEVs and sEV-free plasma. An equal amount of total protein was loaded  
75 in each lane. **(d)** Size distribution and concentration of purified sEVs determined by NTA. **(e)**  
76 Representative TEM images of sEVs. Scale bar: 100 nm. Each experiment was repeated  
77 independently three times, and representative results are shown.  
78

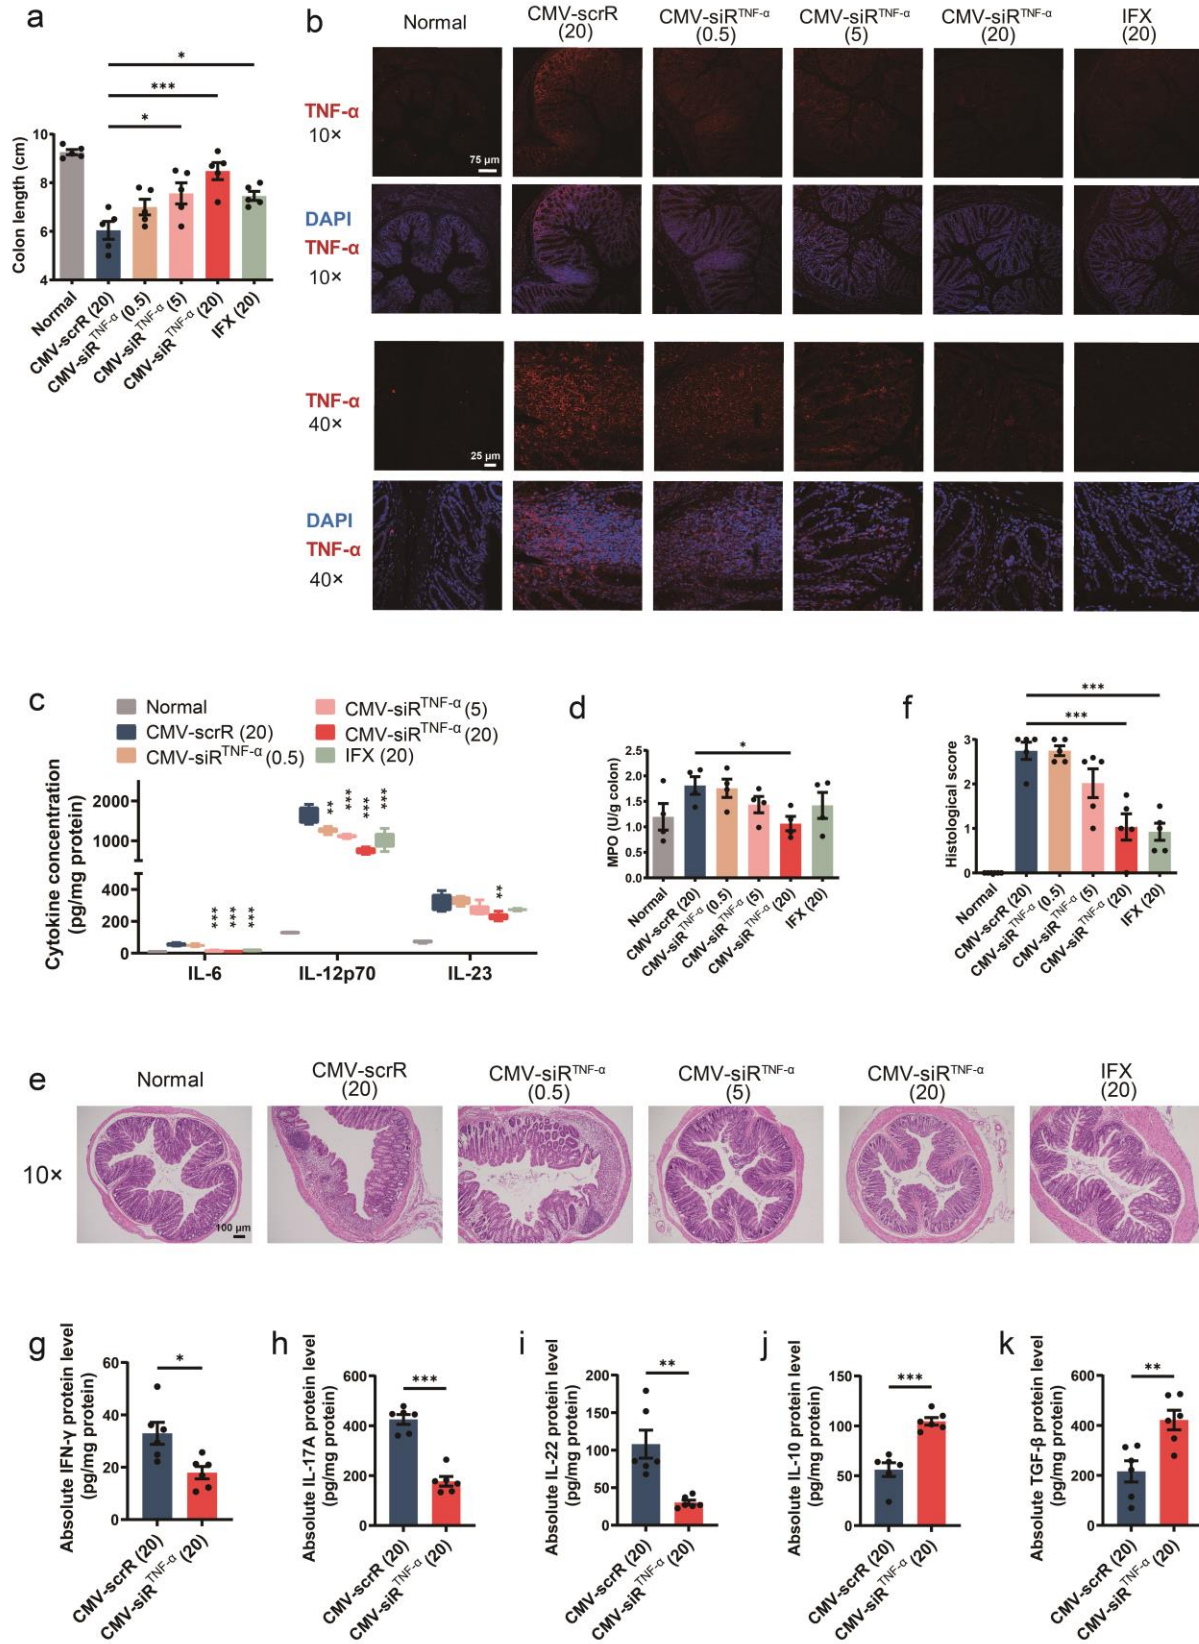

80 **Supplementary Figure 5. Intravenous injection of the CMV-siR<sup>TNF- $\alpha$</sup>  circuit protects mice**  
81 **from DSS-induced acute UC. (a)** Mean colon length (n = 5 in each group). **(b)**  
82 Immunofluorescence staining of TNF- $\alpha$  (red) and DAPI (blue) in colon sections. Scale bar: 75  $\mu$ m  
83 (10  $\times$ ) or 25  $\mu$ m (40  $\times$ ). **(c)** Determination of serum levels of IL-6, IL-12p70 and IL-23 by ELISA  
84 (n = 4 in normal group; n = 5 in CMV-scrR (20), CMV-siR<sup>TNF- $\alpha$</sup>  (0.5), CMV-siR<sup>TNF- $\alpha$</sup>  (5), CMV-  
85 siR<sup>TNF- $\alpha$</sup>  (20) and IFX (20) groups). **(d)** Colonic MPO activity (n = 4 in each group). **(e)**  
86 Representative images of H&E staining of colon sections. Scale bar: 100  $\mu$ m. **(f)** Histological  
87 scores of colon sections (n = 5 in each group). **(g–k)** Determination of the levels of IFN- $\gamma$ , IL-17A,  
88 IL-22, IL-10 and TGF- $\beta$ 1 in the colon by ELISA (n = 6 in each group). Values are presented as the  
89 mean  $\pm$  SEM. Significance was determined using one-way ANOVA followed by Dunnett's  
90 multiple comparison. \* p < 0.05; \*\* p < 0.01; \*\*\* p < 0.005.

91

92

93



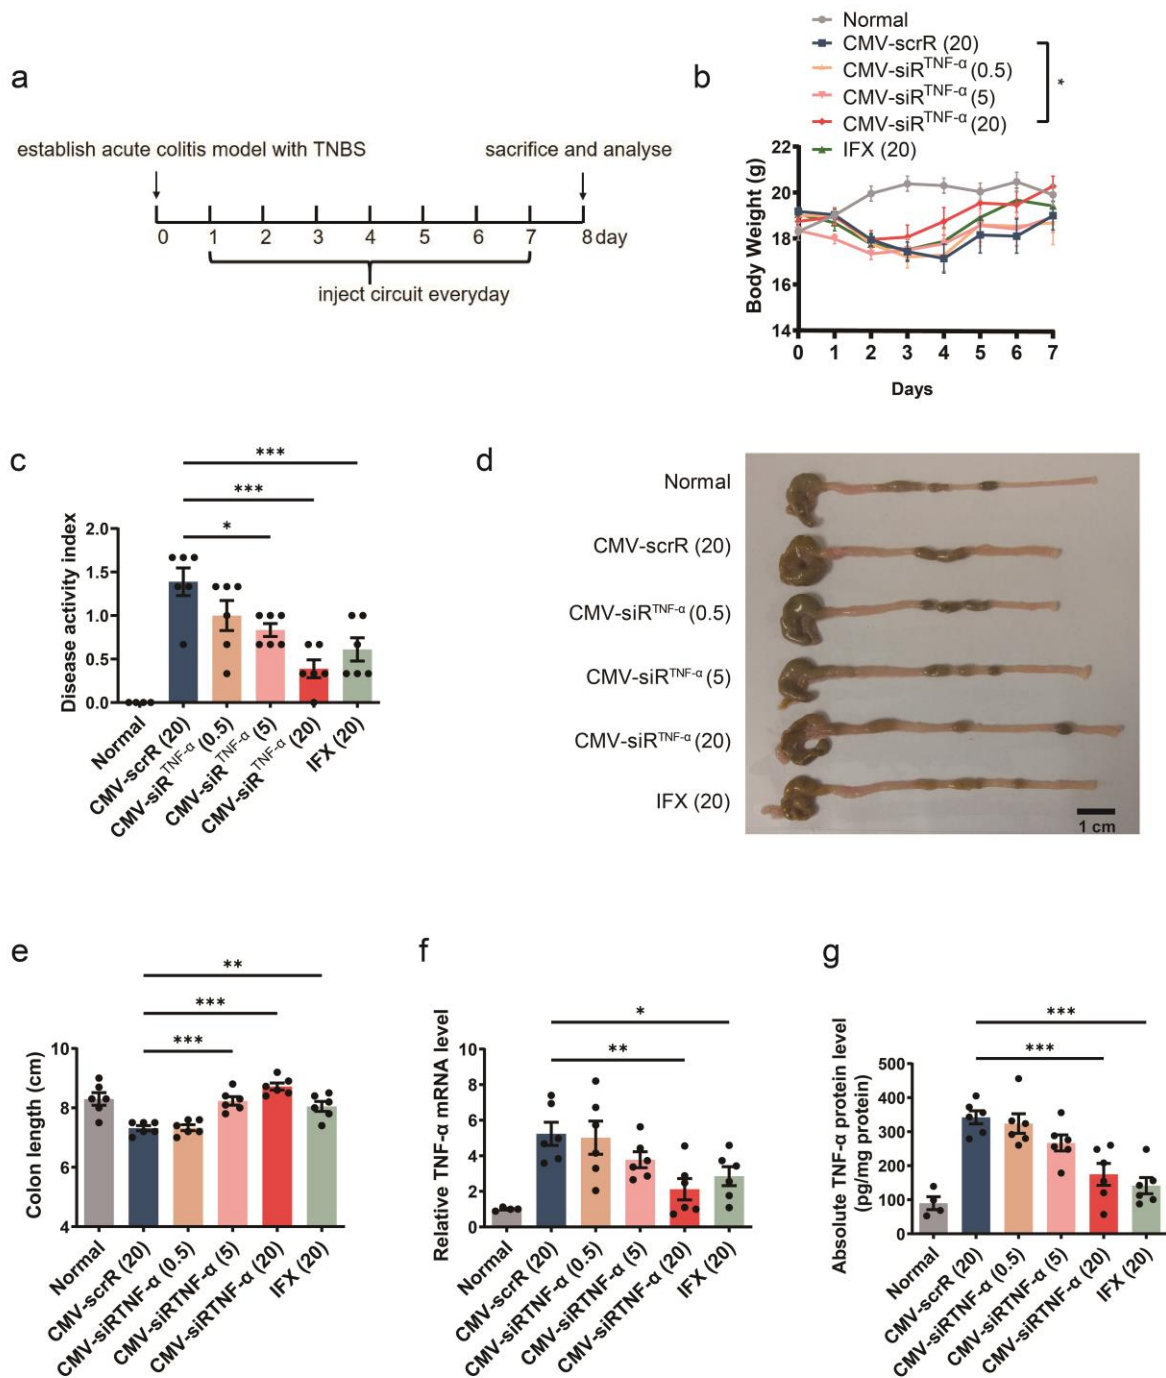

94  
 95 **Supplementary Figure 6. Intravenous injection of the CMV-siR<sup>TNF-α</sup> circuit protects mice**  
 96 **from a TNBS-induced acute colitis model. (a)** Flow chart of the experimental design. Acute  
 97 colitis was induced by intracolonic administration of 2.5% TNBS into BALB/c mice. One day later,  
 98 mice were intravenously injected with 20 mg/kg CMV-scrR or three dosages (0.5, 5 and 20 mg/kg)

99 of CMV-siR<sup>TNF- $\alpha$</sup>  circuit or 20 mg/kg infliximab (IFX) once a day. After 7 injections, the mice were  
100 euthanised. Body weights were monitored daily, and symptoms and histology were evaluated on  
101 day 8. Untreated BALB/c mice were included as normal controls. **(b)** Body weight curves (n = 6  
102 in each group). **(c)** DAI scores (n = 6 in each group). **(d)** Representative macroscopic features of  
103 colons. Scale bar: 1 cm. **(e)** Mean colon length (n = 6 in each group). **(f)** Quantitative RT-PCR  
104 analysis of the relative expression levels of TNF- $\alpha$  mRNA in the colon (n = 6 in each group). **(g)**  
105 Determination of the absolute expression levels of TNF- $\alpha$  protein in the colon by ELISA (n = 6 in  
106 each group). Values are presented as the mean  $\pm$  SEM. Significance was determined using one-  
107 way ANOVA followed by Dunnett's multiple comparison in panels c, e, f and g or two-way  
108 ANOVA followed by Dunnett's multiple comparison in panel b. \* p < 0.05; \*\* p < 0.01; \*\*\* p <  
109 0.005.

110

111

112

113

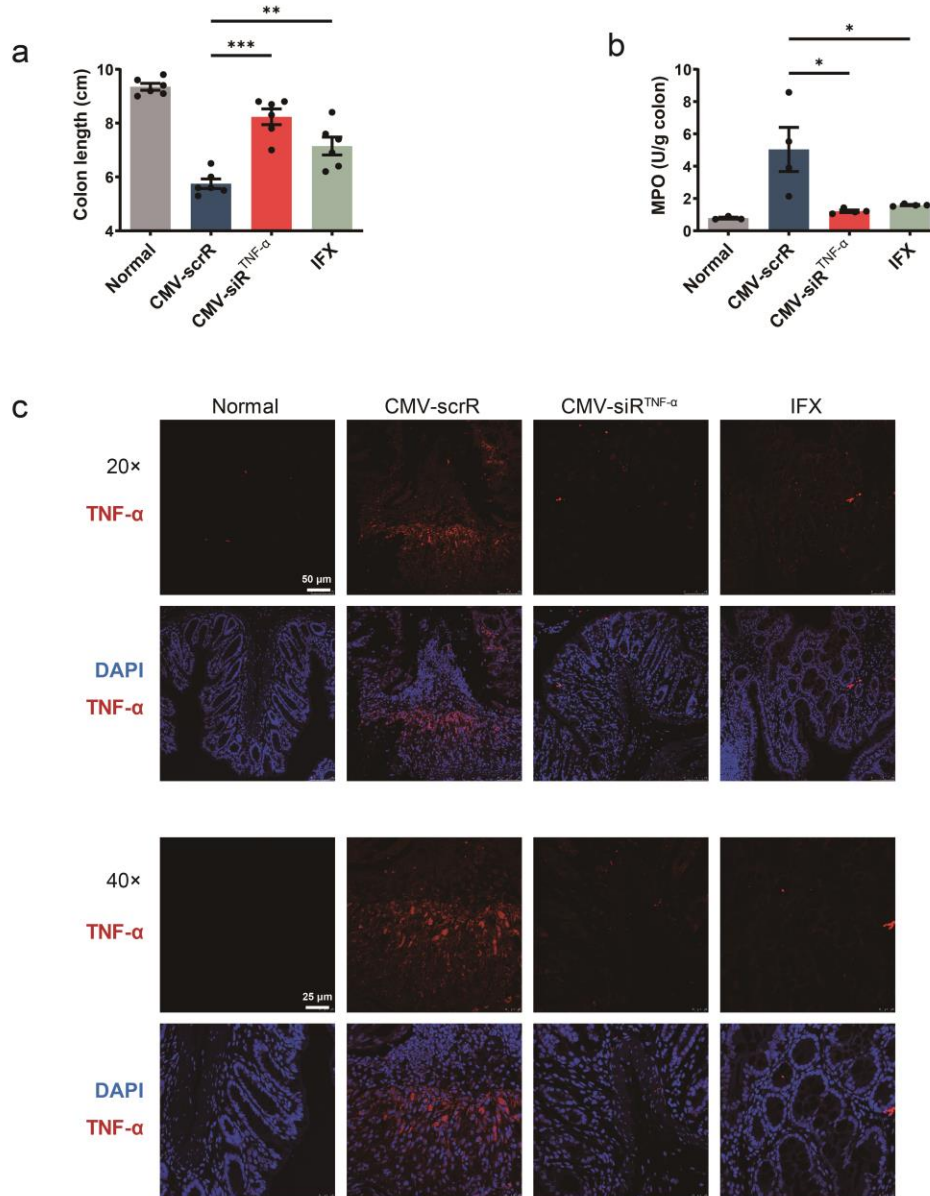

114  
 115 **Supplementary Figure 7. Intravenous injection of the CMV-siR<sup>TNF-α</sup> circuit protects mice**  
 116 **from DSS-induced chronic UC. (a) Mean colon length (n = 6 in each group). (b) Colonic MPO**  
 117 **activity (n = 4 in each group). (c) Immunofluorescence staining of TNF-α (red) and DAPI (blue)**  
 118 **in colon sections. Scale bar: 50 μm (20 ×) or 25 μm (40 ×). Values are presented as the mean ±**  
 119 **SEM. Significance was determined using one-way ANOVA followed by Dunnett's multiple**  
 120 **comparison. \* p < 0.05; \*\* p < 0.01; \*\*\* p < 0.005.**  
 121

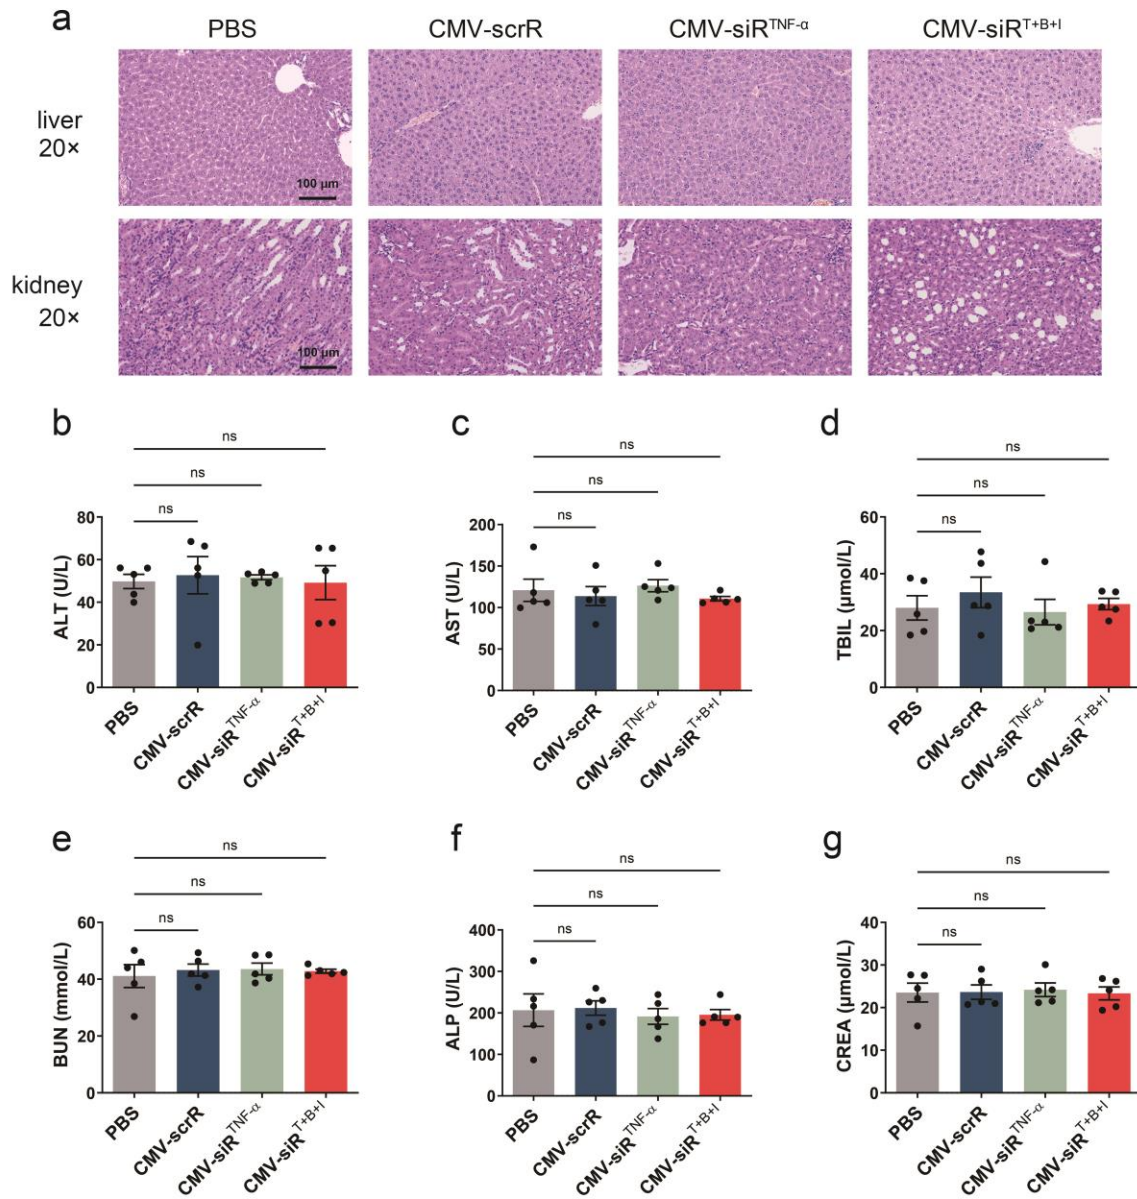

122  
 123 **Supplementary Figure 8. Evaluation of the toxic effects and tissue damage in mice after**  
 124 **intravenous injection of the genetic circuits.** Chronic UC was induced in male BALB/c mice by  
 125 rhythmically administering to mice 2.5% DSS for 1 week and water for 2 weeks and the cycle was  
 126 repeated for 3 times. Four days after each DSS drinking, mice were intravenously injected with  
 127 PBS or with equal dose (20 mg/kg) of CMV-scrR, CMV-siR<sup>TNF-α</sup> or CMV-siR<sup>T+B+I</sup> circuit for a  
 128 total of 3 times, once every 2 days. Twelve hours after the last injection, mice were sacrificed, and  
 129 blood and tissue samples were collected and analysed for serum biochemical indicators and tissue  
 130 damage. **(a)** Histological examination of the liver and kidney. Scale bar: 100 μm. **(b-g)**

131 Measurement of representative serum biochemical indicators, including alanine aminotransferase  
132 (ALT), aspartate aminotransferase (AST), total bilirubin (TBIL), blood urea nitrogen (BUN),  
133 alkaline phosphatase (ALP) and creatinine (CREA), in the serum (n = 5 in each group). Values are  
134 presented as the mean  $\pm$  SEM. Significance was determined using one-way ANOVA followed by  
135 Dunnett's multiple comparison. NS, not significant.

136

137

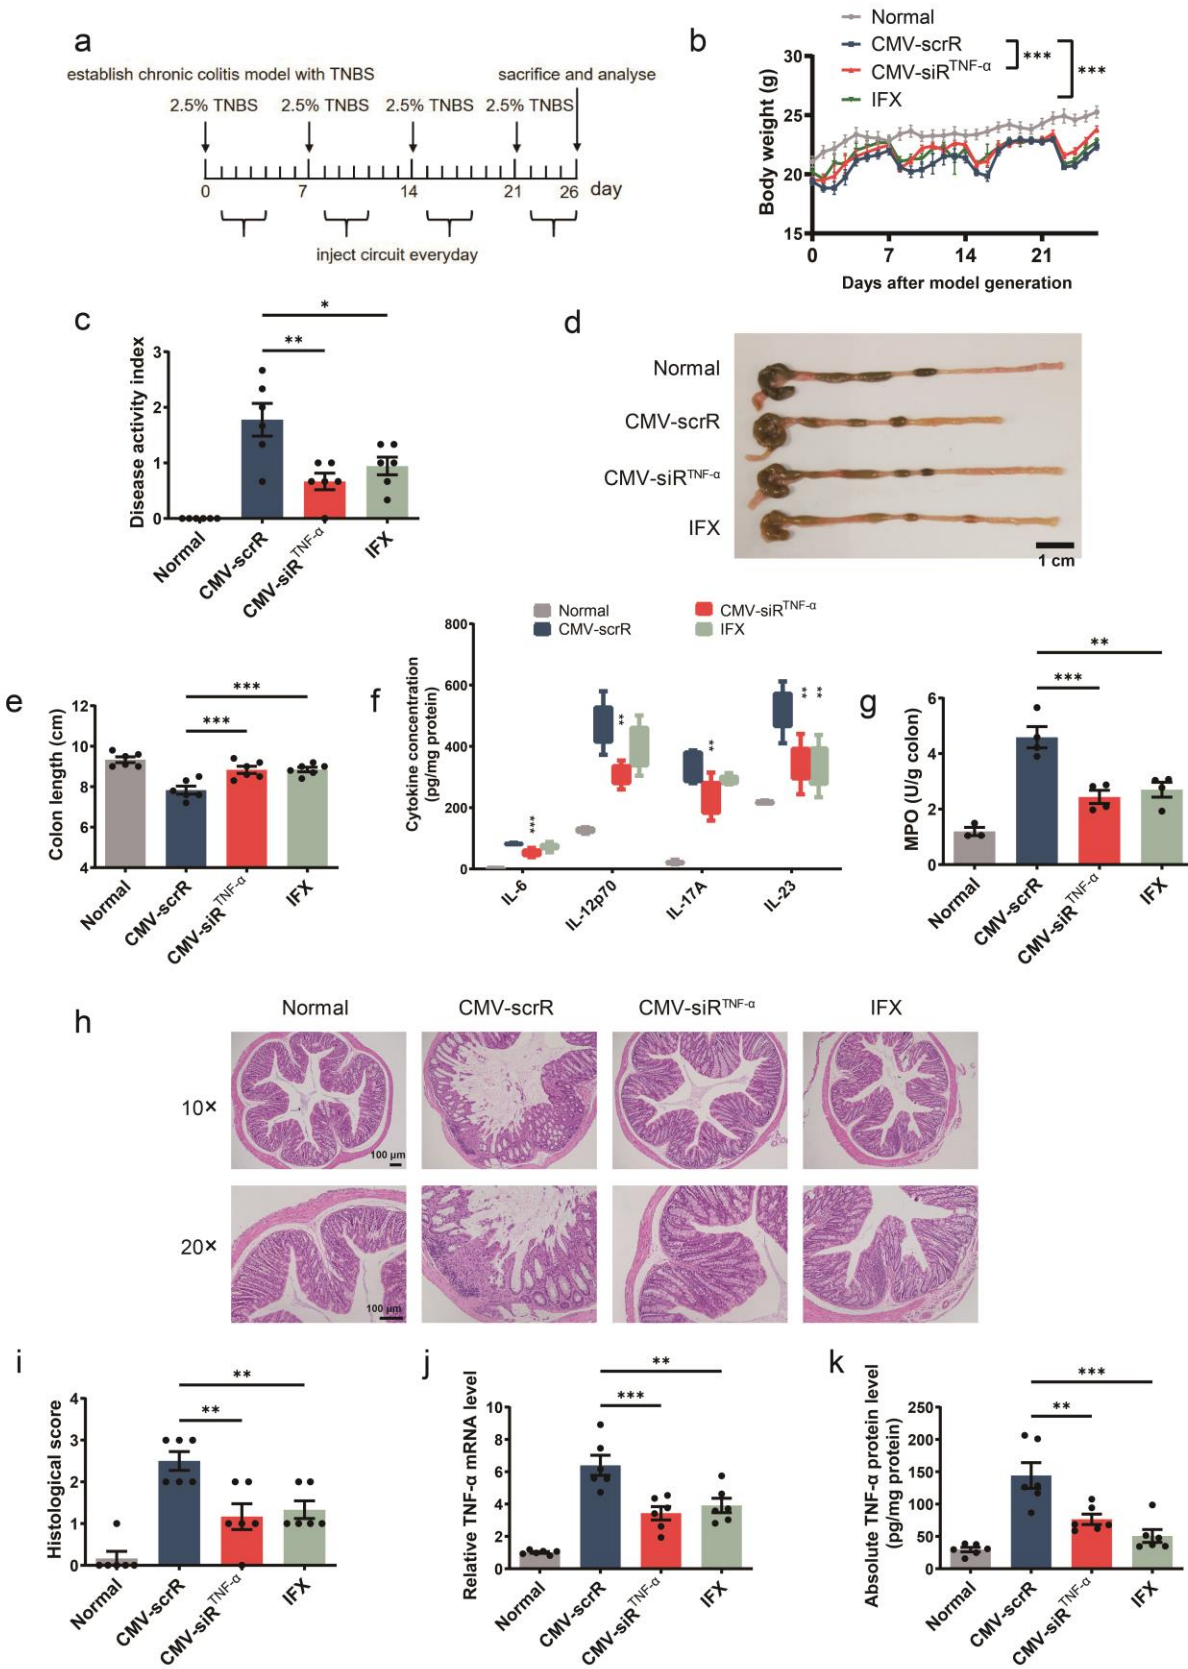

139 **Supplementary Figure 9. Intravenous injection of the CMV-siR<sup>TNF- $\alpha$</sup>  circuit protects mice in**  
140 **the TNBS-induced chronic colitis model. (a)** Flow chart of the experimental design. Chronic  
141 colitis was induced by rhythmic administration (once a week) of 2.5% TNBS into BALB/c mice  
142 for 4 times. After each TNBS administration, mice were intravenously injected with 20 mg/kg  
143 CMV-scrR, 20 mg/kg CMV-siR<sup>TNF</sup> circuit or 20 mg/kg infliximab for a total of 4 times over the  
144 first 4 days. Body weights were monitored daily, and symptoms and histology were evaluated on  
145 day 26. Untreated BALB/c mice were used as normal controls. **(b)** Body weight curves (n = 6 in  
146 each group). **(c)** DAI scores (n = 6 in each group). **(d)** Representative macroscopic features of  
147 colons. Scale bar: 1 cm. **(e)** Mean colon length (n = 6 in each group). **(f)** Determination of serum  
148 levels of IL-6, IL-12p70, IL-17A and IL-23 by ELISA (n = 6 in each group). **(g)** Colonic MPO  
149 activity (n = 4 in each group). **(h)** Representative images of H&E staining of colon sections. Scale  
150 bar: 100  $\mu$ m. **(i)** Histological scores of colon sections (n = 6 in each group). **(j)** Quantitative RT-  
151 PCR analysis of the relative expression levels of TNF- $\alpha$  mRNA in the colon (n = 6 in each group).  
152 **(k)** Determination of the absolute expression levels of TNF- $\alpha$  protein in the colon by ELISA (n =  
153 6 in each group). Values are presented as the mean  $\pm$  SEM. Significance was determined using one-  
154 way ANOVA followed by Dunnett's multiple comparison in panels c, e, f, g, i, j and k or two-way  
155 ANOVA followed by Dunnett's multiple comparison in panel b. \* p < 0.05; \*\* p < 0.01; \*\*\* p <  
156 0.005.  
157

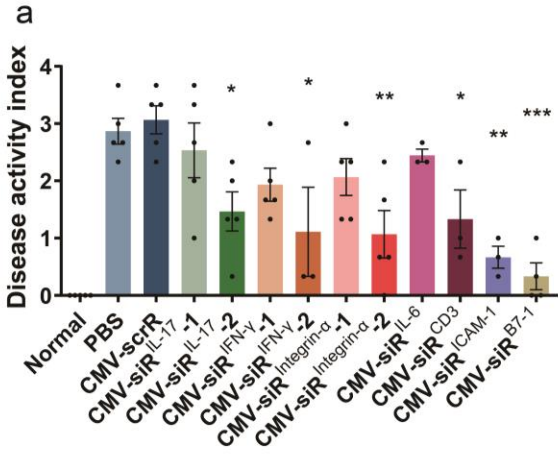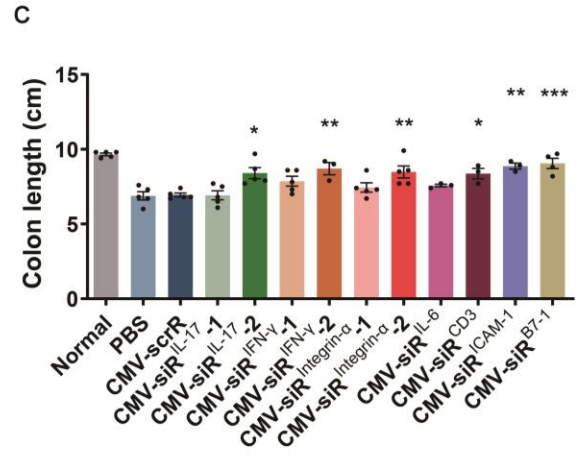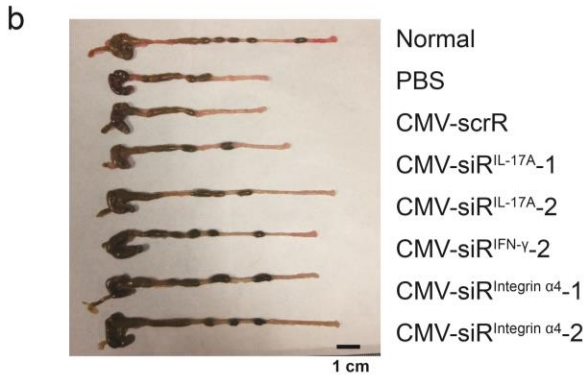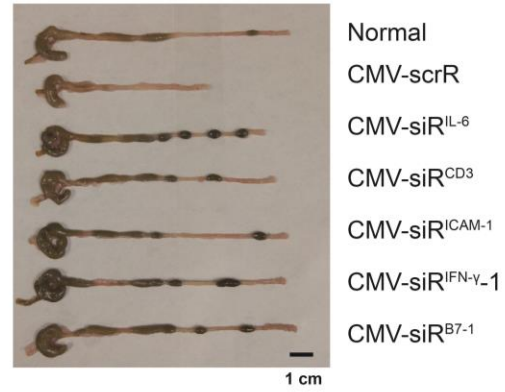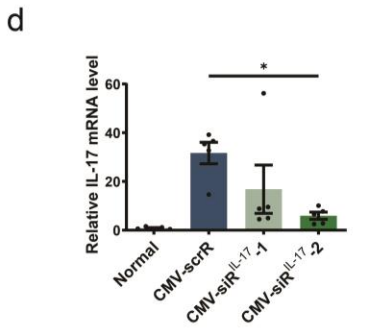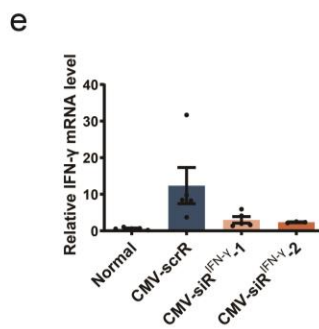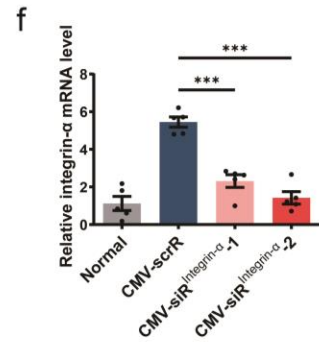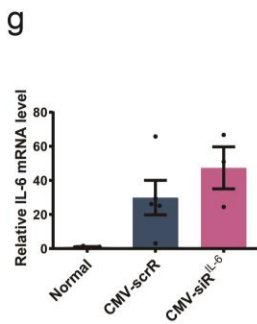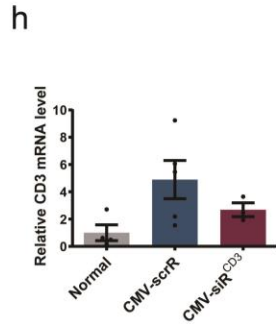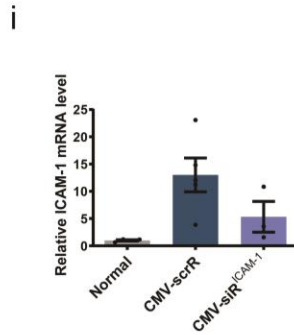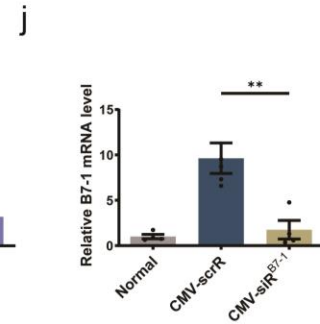



159 **Supplementary Figure 10. Assessing the therapeutic efficacy of candidate siRNA expression**  
160 **cassettes.** Acute UC was induced in male BALB/c mice by replacing their drinking water with a  
161 2.5% DSS solution for 7 days. From day 3 of modelling, the mice were intravenously injected once  
162 a day with PBS, CMV-scrR, two types of genetic circuits targeting IL-17A (CMV-siR<sup>IL-17A-1</sup> and  
163 CMV-siR<sup>IL-17A-2</sup>), two types of genetic circuits targeting INF- $\gamma$  (CMV-siR<sup>INF- $\gamma$ -1</sup> and CMV-siR<sup>INF- $\gamma$ -2</sup>),  
164 a genetic circuit targeting IL-6 (CMV-siR<sup>IL-6</sup>), two types of genetic circuits targeting integrin  
165  $\alpha$ 4 (CMV-siR<sup>Integrin  $\alpha$ 4-1</sup> and CMV-siR<sup>Integrin  $\alpha$ 4-2</sup>), a genetic circuit targeting ICAM-1 (CMV-  
166 siR<sup>ICAM-1</sup>), a genetic circuit targeting CD3 (CMV-siR<sup>CD3</sup>) or a genetic circuit targeting B7-1 (CMV-  
167 siR<sup>B7-1</sup>). Each genetic circuit was injected at a dosage of 20 mg/kg. After 7 injections on day 10,  
168 the mice were euthanised and analysed. Untreated BALB/c mice were included as normal controls.  
169 **(a)** DAI scores (n = 3 in each group). **(b)** Representative macroscopic features of colons. Scale bar:  
170 1 cm. **(c)** Mean colon length (n = 3 in each group). **(d)** Quantitative RT-PCR analysis of the relative  
171 expression levels of IL-17A mRNA in the colon after treatment with CMV-siR<sup>IL-17A-1</sup> and CMV-  
172 siR<sup>IL-17A-2</sup> (n = 3 in each group). **(e)** Quantitative RT-PCR analysis of the relative expression levels  
173 of IFN- $\gamma$  mRNA in the colon after treatment with CMV-siR<sup>INF- $\gamma$ -1</sup> and CMV-siR<sup>INF- $\gamma$ -2</sup> (n = 3 in  
174 each group). **(f)** Quantitative RT-PCR analysis of the relative expression levels of integrin  $\alpha$ 4  
175 mRNA in the colon after treatment with CMV-siR<sup>Integrin  $\alpha$ 4-1</sup> and CMV-siR<sup>Integrin  $\alpha$ 4-2</sup> (n = 3 in each  
176 group). **(g)** Quantitative RT-PCR analysis of the relative expression levels of IL-6 mRNA in the  
177 colon after treatment with CMV-siR<sup>IL-6</sup> (n = 3 in each group). **(h)** Quantitative RT-PCR analysis  
178 of the relative expression levels of CD3 mRNA in the colon after treatment with CMV-siR<sup>CD3</sup> (n  
179 = 3 in each group). **(i)** Quantitative RT-PCR analysis of the relative expression levels of ICAM-1  
180 mRNA in the colon after treatment with CMV-siR<sup>ICAM-1</sup> (n = 3 in each group). **(j)** Quantitative RT-  
181 PCR analysis of the relative expression levels of B7-1 mRNA in the colon after treatment with  
182 CMV-siR<sup>B7-1</sup> (n = 3 in each group). Values are presented as the mean  $\pm$  SEM. Significance was  
183 determined using one-way ANOVA followed by Dunnett's multiple comparison. In panels a and  
184 b, all groups were compared with CMV-scrR. \* p < 0.05; \*\* p < 0.01; \*\*\* p < 0.005.

185

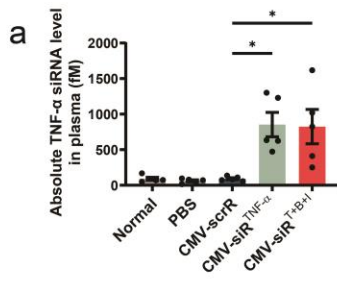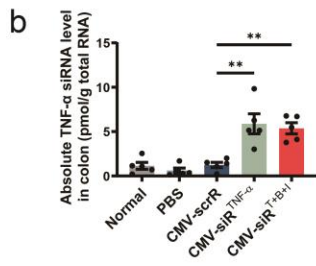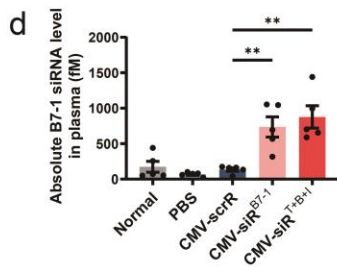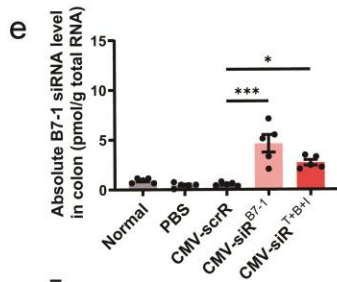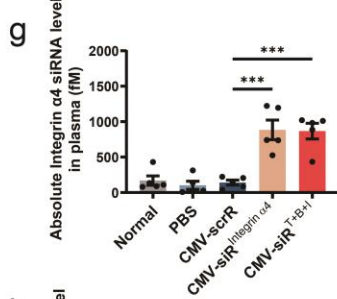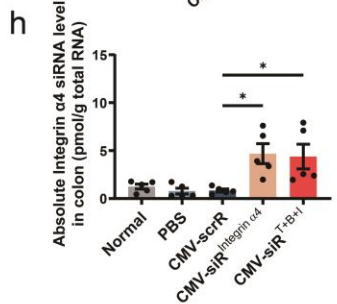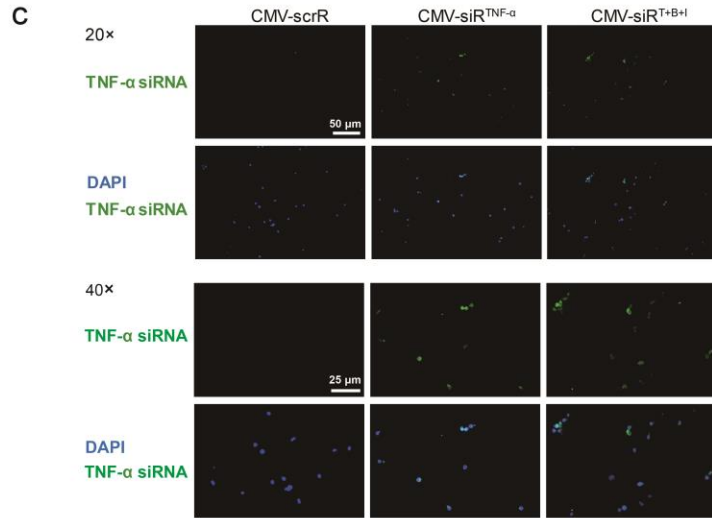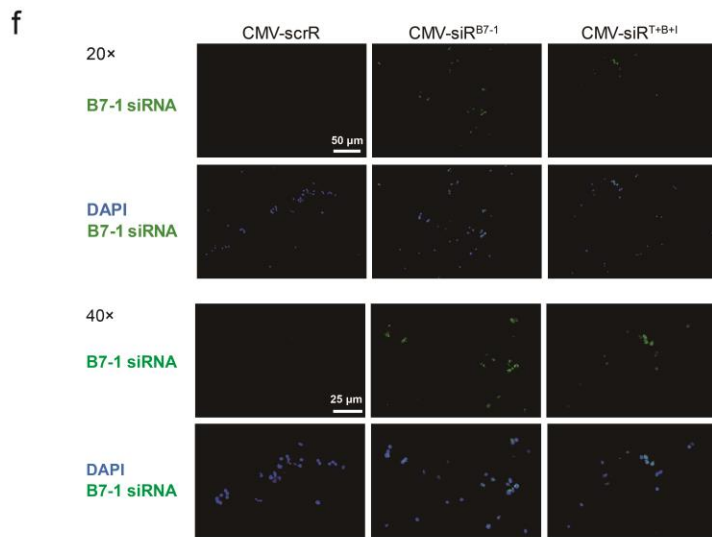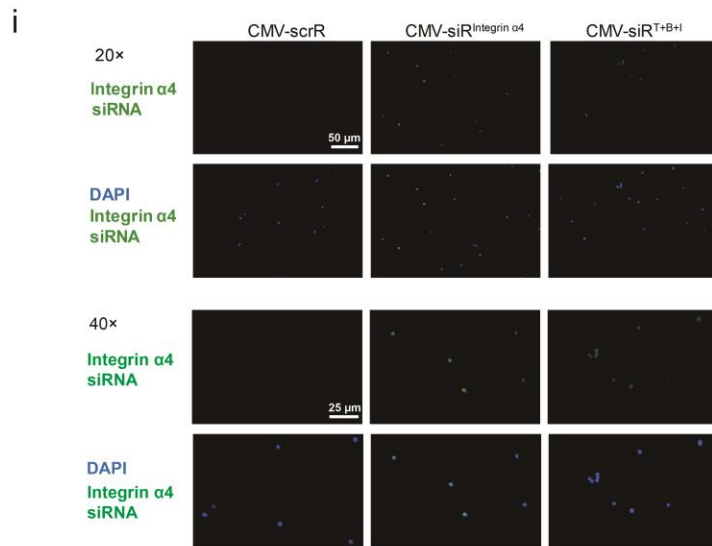

187 **Supplementary Figure 11. Tracking and visualisation of the delivery of self-assembled**  
188 **siRNAs into desired tissues and cells in the DSS-induced acute UC model.** Chronic UC was  
189 induced in male BALB/c mice by rhythmically administering to mice 2.5% DSS for 1 week and  
190 water for 2 weeks and the cycle was repeated for 3 times. Four days after each DSS drinking, mice  
191 were intravenously injected with PBS or with equal dose (10 mg/kg) of CMV-scrR, CMV-siR<sup>TNF-</sup>  
192 <sup>α</sup>, CMV-siR<sup>Integrin α4</sup>, CMV-siR<sup>B7-1</sup> or CMV-siR<sup>T+B+I</sup> circuit for a total of 3 times, once every 2 days.  
193 Two days after the final injection on day 52, the mice were euthanised, and the presence of siRNAs  
194 in various tissues and cells was evaluated. **(a and b)** Quantitative RT-PCR analysis of the absolute  
195 expression levels of TNF-α siRNA in the plasma and colon (n = 5 in each group). **(c)** *In situ*  
196 detection of TNF-α siRNA in colonic macrophages extracted from DSS mice. Positive *in situ*  
197 hybridisation signals are shown in green, and DAPI-stained nuclei are shown in blue. Scale bar: 50  
198 μm (20 ×) or 25 μm (40 ×). **(d and e)** Quantitative RT-PCR analysis of the absolute expression  
199 levels of B7-1 siRNA in the plasma and colon (n = 5 in each group). **(f)** *In situ* detection of B7-1  
200 siRNA in colonic macrophages extracted from DSS mice. Positive *in situ* hybridisation signals are  
201 shown in green, and DAPI-stained nuclei are shown in blue. Scale bar: 50 μm (20 ×) or 25 μm (40  
202 ×). **(g and h)** Quantitative RT-PCR analysis of the absolute expression levels of integrin α4 siRNA  
203 in the plasma and colon (n = 5 in each group). **(i)** *In situ* detection of integrin α4 siRNA in peripheral  
204 blood CD4<sup>+</sup> T cells extracted from DSS mice. Positive *in situ* hybridisation signals are shown in  
205 green, and DAPI-stained nuclei are shown in blue. Scale bar: 50 μm (20 ×) or 25 μm (40 ×). Values  
206 are presented as the mean ± SEM. Significance was determined using one-way ANOVA followed  
207 by Dunnett's multiple comparison. \* p < 0.05; \*\* p < 0.01; \*\*\* p < 0.005.

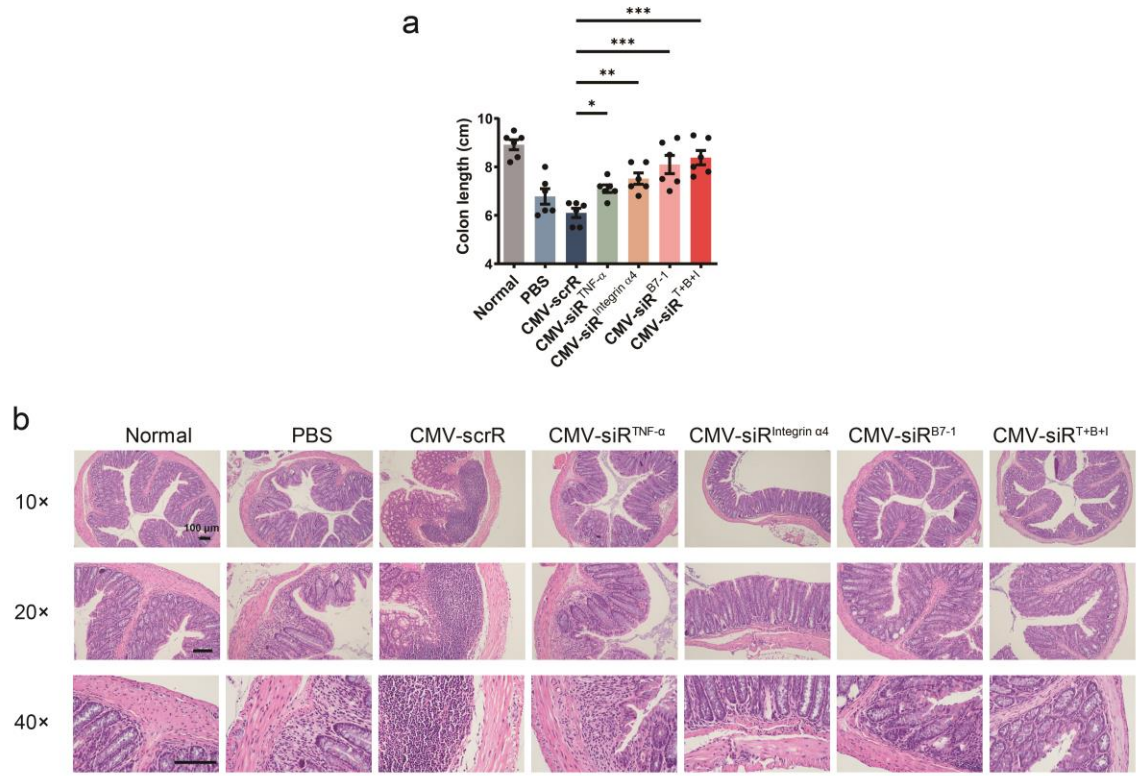

208  
 209 **Supplementary Figure 12. Intravenous injection of the multi-targeted CMV-siR<sup>T+B+I</sup> circuit**  
 210 **exerts a synergistic therapeutic effect against DSS-induced chronic UC.** Chronic UC was  
 211 induced in male BALB/c mice by rhythmically administering to mice 2.5% DSS for 1 week and  
 212 water for 2 weeks and the cycle was repeated for 3 times. Four days after each DSS drinking, mice  
 213 were intravenously injected with PBS or with equal dose (10 mg/kg) of CMV-scrR, CMV-siR<sup>TNF-</sup>  
 214 <sup>α</sup>, CMV-siR<sup>Integrin α4</sup>, CMV-siR<sup>B7-1</sup> or CMV-siR<sup>T+B+I</sup> circuit for a total of 3 times, once every 2 days.  
 215 Two days after the final injection on day 52, the mice were euthanised and analysed. Untreated  
 216 BALB/c mice were included as normal controls. **(a)** Mean colon length (n = 6 in each group). **(b)**  
 217 Representative images of H&E staining of colon sections. Scale bar: 100 μm. Values are presented  
 218 as the mean ± SEM. Significance was determined using one-way ANOVA followed by Dunnett's  
 219 multiple comparison. \* p < 0.05; \*\* p < 0.01; \*\*\* p < 0.005.

220  
 221  
 222  
 223  
 224

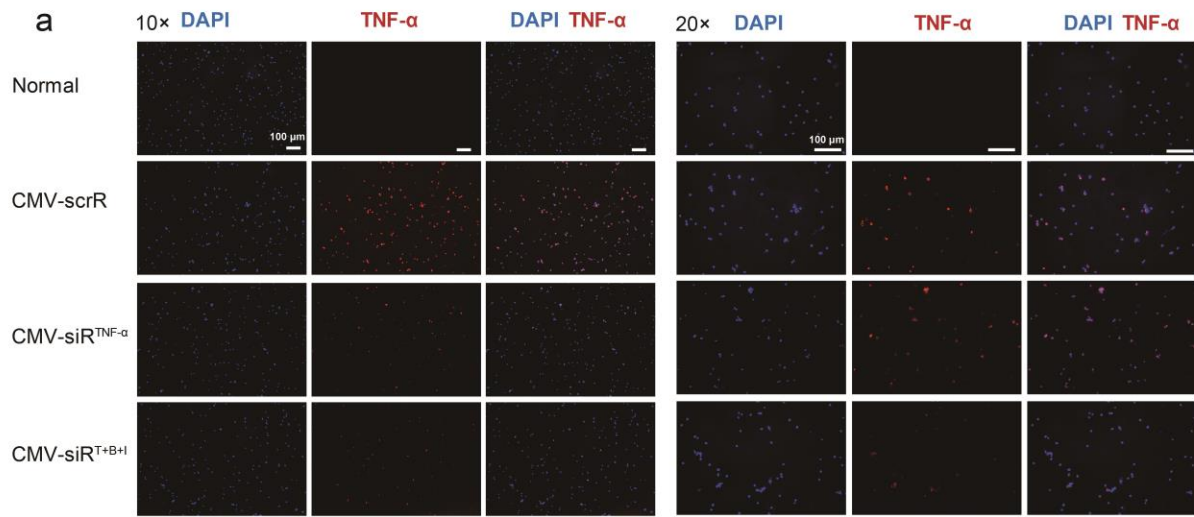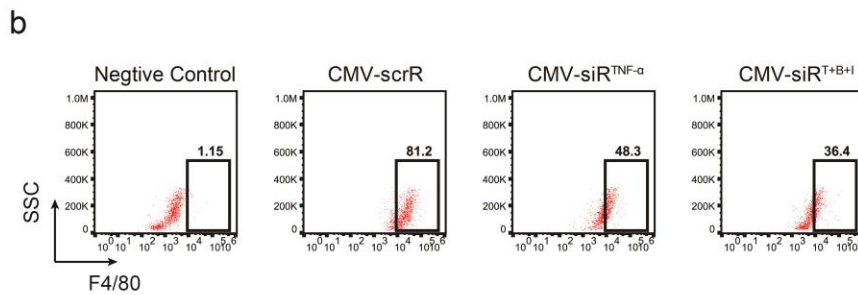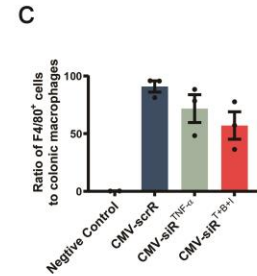

225  
 226 **Supplementary Figure 13. Intravenous injection of the multi-targeted CMV-siR<sup>T+B+I</sup> circuit**  
 227 **inhibits TNF- $\alpha$  in macrophages. (a)** Immunofluorescence staining of TNF- $\alpha$  (red) and DAPI  
 228 (blue) in primary macrophages isolated from colonic lamina propria and cultured in conditioned  
 229 medium for 12 hours. Scale bar: 100  $\mu$ m. **(b)** Representative flow cytometric plots of F4/80<sup>+</sup>  
 230 on colonic lamina propria macrophages. IgG isotype-labelled cells was used as a negative control. **(c)**  
 231 The population of F4/80<sup>+</sup> cells in all colonic lamina propria macrophages (n = 3 in each group).  
 232 Values are presented as the mean  $\pm$  SEM. Significance was determined using one-way ANOVA  
 233 followed by Dunnett's multiple comparison.  
 234

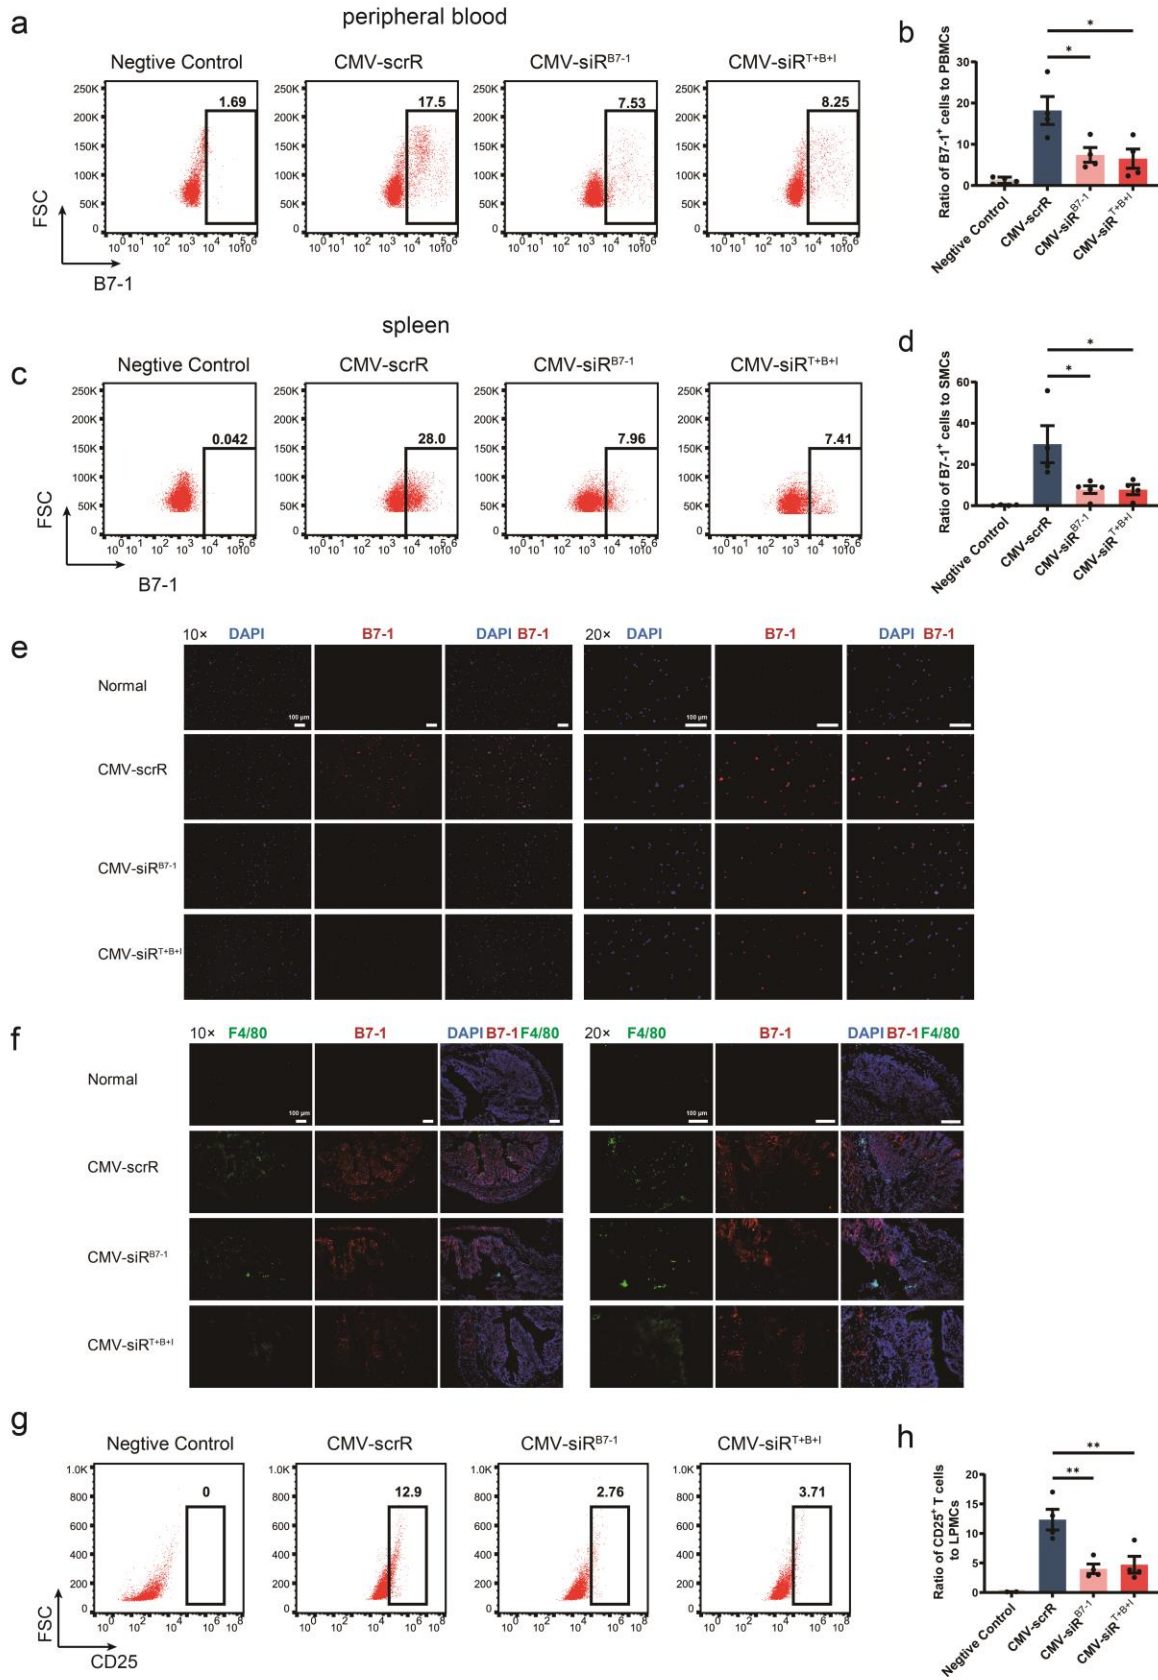

236 **Supplementary Figure 14. Intravenous injection of the multi-targeted CMV-siR<sup>T+B+I</sup> circuit**  
237 **inhibits B7-1 in macrophages.** (a) Representative flow cytometric plots of B7-1 on the surface of  
238 peripheral blood mononuclear cells. IgG isotype-labelled cells was used as a negative control. (b)  
239 The population of B7-1<sup>+</sup> cells in peripheral blood mononuclear cells (PBMCs) (n = 4 in each group).  
240 (c) Representative flow cytometric plots of B7-1 on the surface of splenic mononuclear cells. IgG  
241 isotype-labelled cells was used as a negative control. (d) The population of B7-1<sup>+</sup> cells in splenic  
242 mononuclear cells (SMCs) (n = 4 in each group). (e) Immunofluorescence staining of B7-1 (red)  
243 and DAPI (blue) in primary macrophages isolated from colonic lamina propria and cultured in  
244 conditioned medium for 12 hours. Scale bar: 100  $\mu$ m. (f) Immunofluorescence staining of B7-1  
245 (red), F4/80 (green) and DAPI (blue) in colon sections. Double-positive (red and green) signals  
246 indicate B7-1<sup>+</sup> macrophages. Scale bar: 100  $\mu$ m. (g) Representative flow cytometric plots of CD25  
247 on colonic lamina propria mononuclear cells. IgG isotype-labelled cells was used as a negative  
248 control. (h) The population of CD25<sup>+</sup> T cells in total colonic lamina propria mononuclear cells (n  
249 = 4 in each group). Values are presented as the mean  $\pm$  SEM. Significance was determined using  
250 one-way ANOVA followed by Dunnett's multiple comparison. \* p < 0.05; \*\* p < 0.01.

251

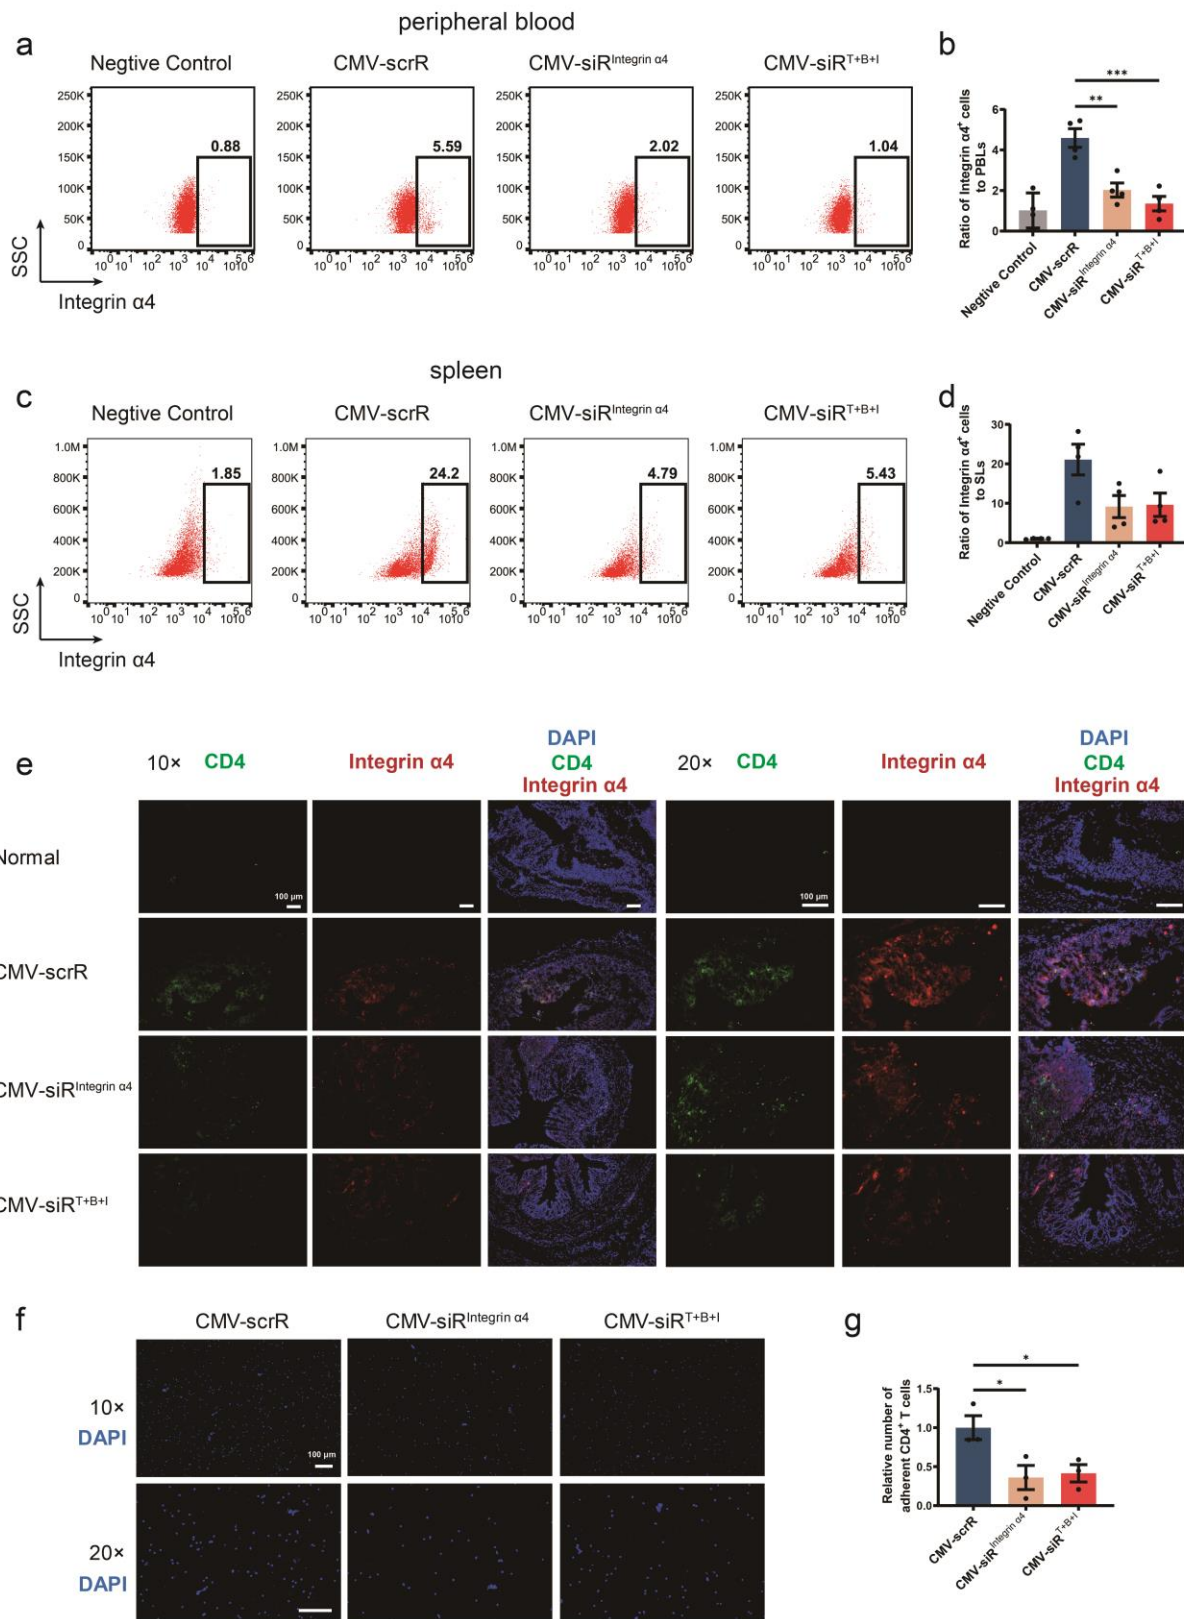



253 **Supplementary Figure 15. Intravenous injection of the multi-targeted CMV-siR<sup>T+B+I</sup> circuit**  
254 **inhibits integrin  $\alpha 4$  in CD4<sup>+</sup> T cells.** (a) Representative flow cytometric plots of integrin  $\alpha 4$  on  
255 the surface of peripheral blood lymphocytes. IgG isotype-labelled cells was used as a negative  
256 control. (b) The population of integrin  $\alpha 4^+$  cells in peripheral blood lymphocytes (PBLs) (n = 4 in  
257 each group). (c) Representative flow cytometric plots of integrin  $\alpha 4$  on the surface of splenic  
258 lymphocytes. IgG isotype-labelled cells was used as a negative control. (d) The population of  
259 integrin  $\alpha 4^+$  cells in splenic lymphocytes (SLs) (n = 4 in each group). (e) Immunofluorescence  
260 staining of integrin  $\alpha 4$  (red), CD4 (green) and DAPI (blue) in colon sections. Double-positive (red  
261 and green) signals indicate integrin  $\alpha 4^+$  CD4<sup>+</sup> cells. Scale bar: 100  $\mu\text{m}$ . (f) Representative images  
262 of adhesion assays showing the adhesion of peripheral blood integrin  $\alpha 4^+$  CD4<sup>+</sup> T cells to plates  
263 coated with E-cadherin. Scale bars: 100  $\mu\text{m}$ . (g) Quantitative analysis of the amounts of adherent  
264 CD4<sup>+</sup> T cells (n = 3 in each group). Values are presented as the mean  $\pm$  SEM. Significance was  
265 determined using one-way ANOVA followed by Dunnett's multiple comparison. \* p < 0.05; \*\* p  
266 < 0.01; \*\*\* p < 0.005.

267

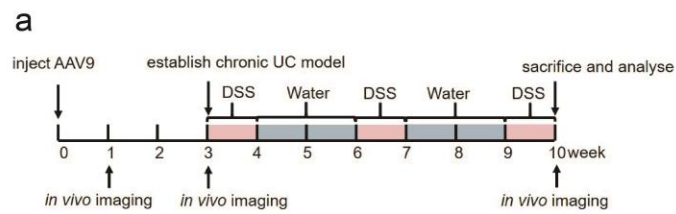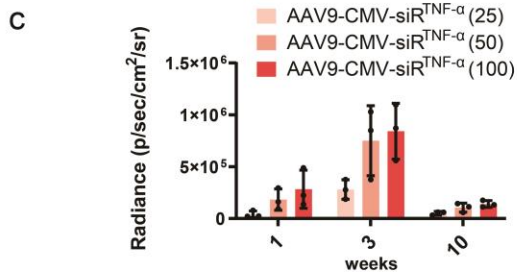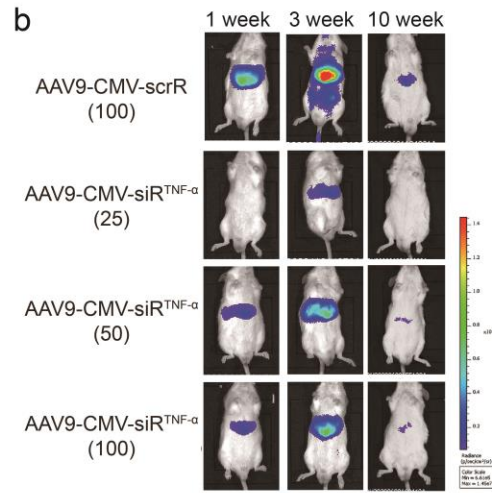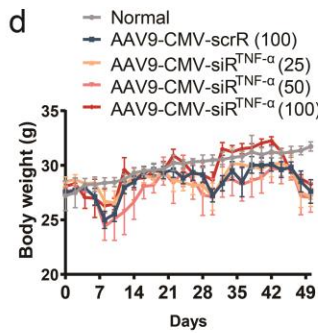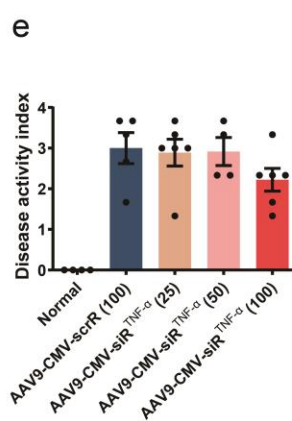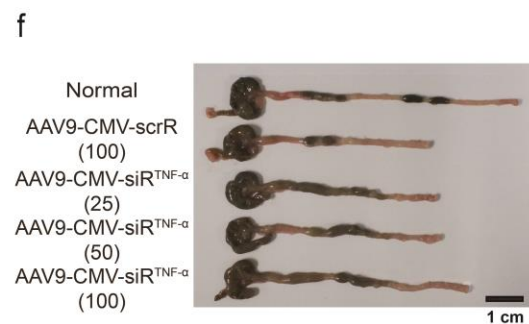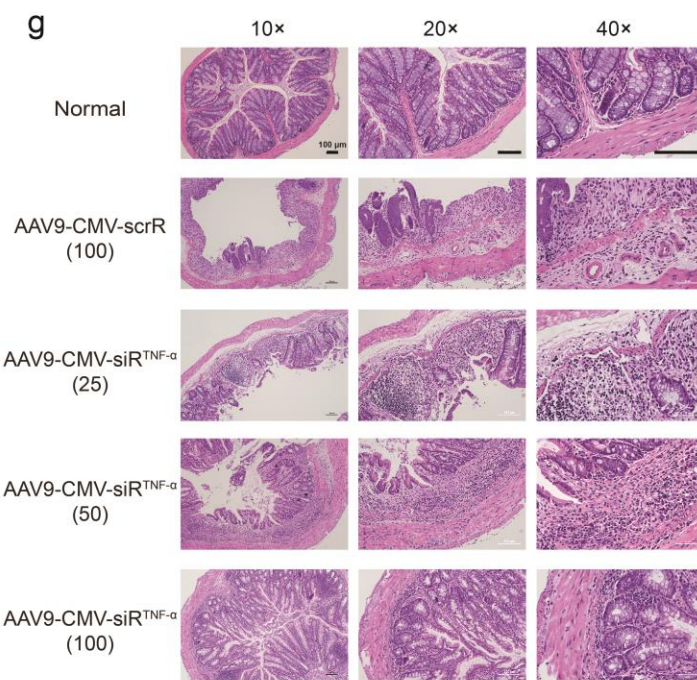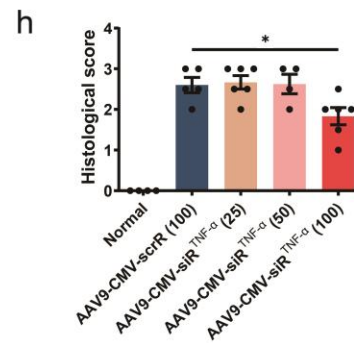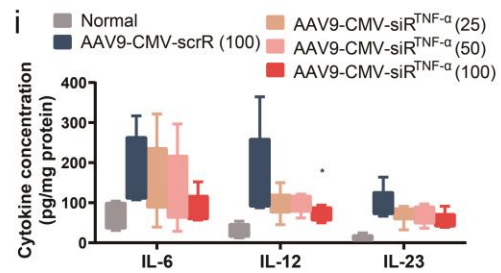

269 **Supplementary Figure 16. Intravenous injection of the AAV9-CMV-siR<sup>TNF- $\alpha$</sup>  induces a long-**  
270 **term therapeutic effect in the DSS-induced chronic UC model. (a)** Flow chart of the  
271 experimental design. **(b and c)** Evaluation of AAV-mediated luciferase expression to reflect co-  
272 expressed TNF- $\alpha$  siRNA accumulation *in vivo* (n = 3 in each group). **(d)** Body weight curves  
273 (Normal, n = 4; AAV9-CMV-scrR (100), n = 5; AAV9-CMV-siR<sup>TNF- $\alpha$</sup>  (25), n = 6; AAV9-CMV-  
274 siR<sup>TNF- $\alpha$</sup>  (50), n = 4; AAV9-CMV-siR<sup>TNF- $\alpha$</sup>  (100), n = 6). **(e)** DAI scores (Normal, n = 4; AAV9-  
275 CMV-scrR (100), n = 5; AAV9-CMV-siR<sup>TNF- $\alpha$</sup>  (25), n = 6; AAV9-CMV-siR<sup>TNF- $\alpha$</sup>  (50), n = 4;  
276 AAV9-CMV-siR<sup>TNF- $\alpha$</sup>  (100), n = 6). **(f)** Representative macroscopic features of colons. Scale bar:  
277 1 cm. **(g)** Representative images of H&E staining of colon sections. Scale bar: 100  $\mu$ m. **(h)**  
278 Histological scores of colon sections (Normal, n = 4; AAV9-CMV-scrR (100), n = 5; AAV9-CMV-  
279 siR<sup>TNF- $\alpha$</sup>  (25), n = 6; AAV9-CMV-siR<sup>TNF- $\alpha$</sup>  (50), n = 4; AAV9-CMV-siR<sup>TNF- $\alpha$</sup>  (100), n = 6). **(i)**  
280 Determination of serum levels of IL-6, IL-12p70 and IL-23 by ELISA (Normal, n = 4; AAV9-  
281 CMV-scrR (100), n = 5; AAV9-CMV-siR<sup>TNF- $\alpha$</sup>  (25), n = 6; AAV9-CMV-siR<sup>TNF- $\alpha$</sup>  (50), n = 4;  
282 AAV9-CMV-siR<sup>TNF- $\alpha$</sup>  (100), n = 6). Values are presented as the mean  $\pm$  SEM. Significance was  
283 determined using one-way ANOVA followed by Dunnett's multiple comparison in panels e, h and  
284 i or two-way ANOVA followed by Dunnett's multiple comparison in panel d. \* p < 0.05; \*\* p <  
285 0.01.  
286

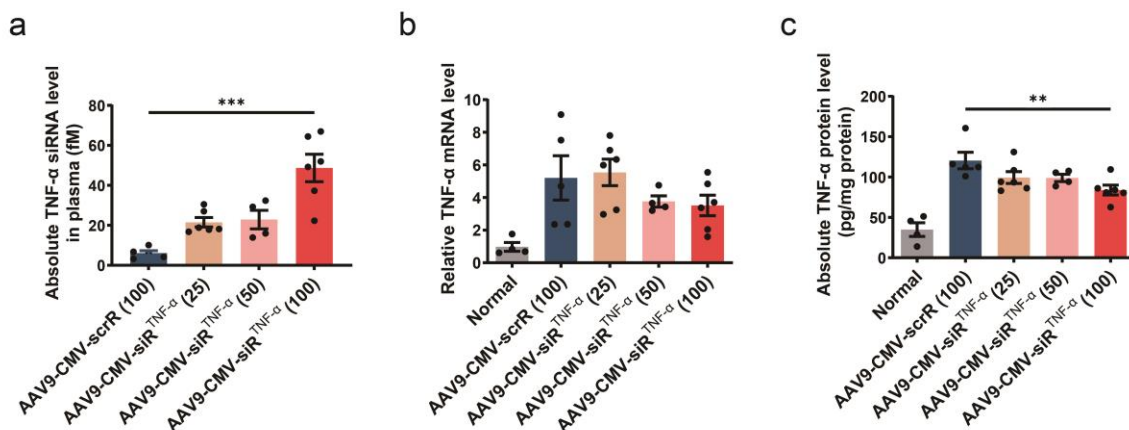

287  
 288 **Supplementary Figure 17. Intravenous injection of the AAV9-CMV-siR<sup>TNF-α</sup> results in TNF-**  
 289 **α siRNA accumulation in the plasma and TNF-α downregulation in the colon. (a)** Quantitative  
 290 RT-PCR analysis of the absolute expression levels of TNF-α siRNA in plasma (Normal, n = 4;  
 291 AAV9-CMV-scrR (100), n = 5; AAV9-CMV-siR<sup>TNF-α</sup> (25), n = 6; AAV9-CMV-siR<sup>TNF-α</sup> (50), n =  
 292 4; AAV9-CMV-siR<sup>TNF-α</sup> (100), n = 6). **(b)** Quantitative RT-PCR analysis of the relative expression  
 293 levels of TNF-α mRNA in the colon (Normal, n = 4; AAV9-CMV-scrR (100), n = 5; AAV9-CMV-  
 294 siR<sup>TNF-α</sup> (25), n = 6; AAV9-CMV-siR<sup>TNF-α</sup> (50), n = 4; AAV9-CMV-siR<sup>TNF-α</sup> (100), n = 6). **(c)**  
 295 Determination of the absolute expression levels of TNF-α protein in the colon by ELISA (Normal,  
 296 n = 4; AAV9-CMV-scrR (100), n = 5; AAV9-CMV-siR<sup>TNF-α</sup> (25), n = 6; AAV9-CMV-siR<sup>TNF-α</sup>  
 297 (50), n = 4; AAV9-CMV-siR<sup>TNF-α</sup> (100), n = 6). Values are presented as the mean ± SEM.  
 298 Significance was determined using one-way ANOVA followed by Dunnett's multiple comparison.  
 299 \*\* p < 0.01, \*\*\* p < 0.005.

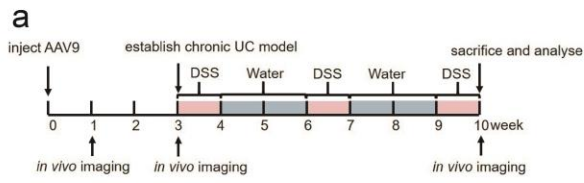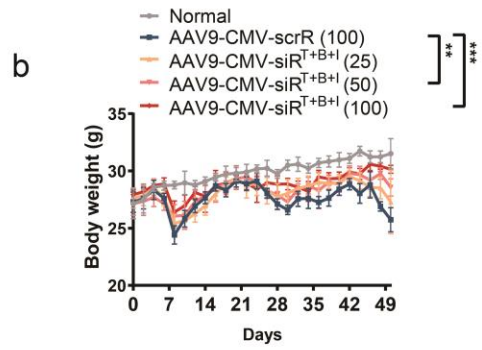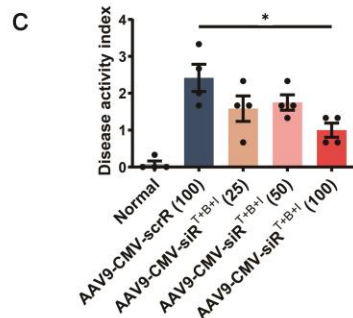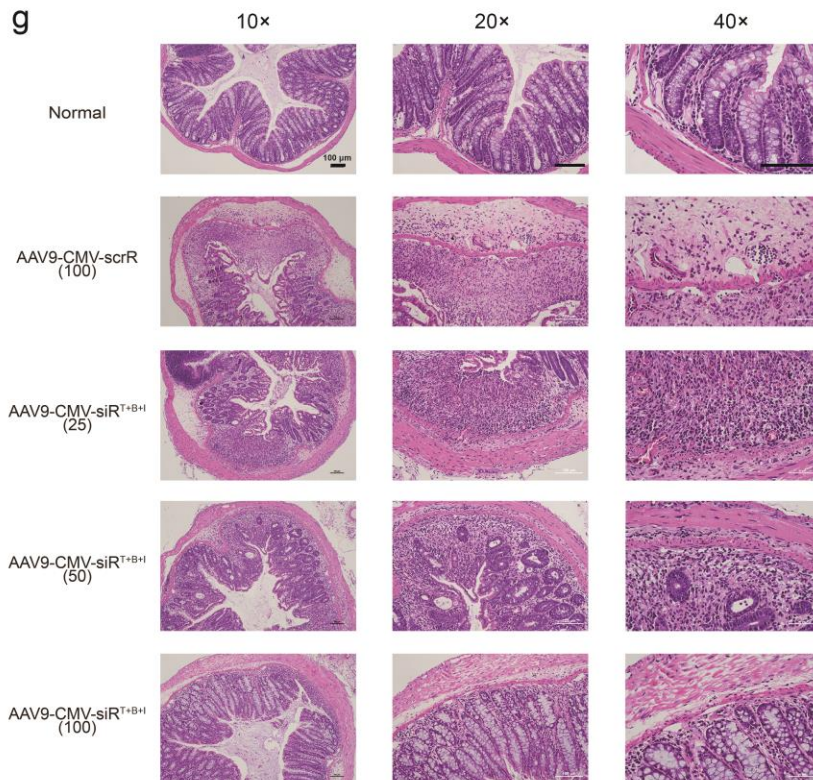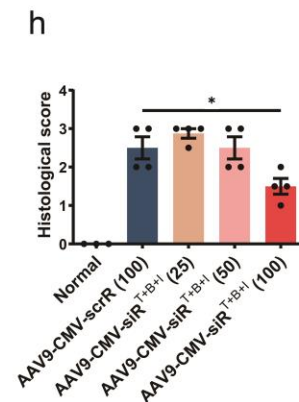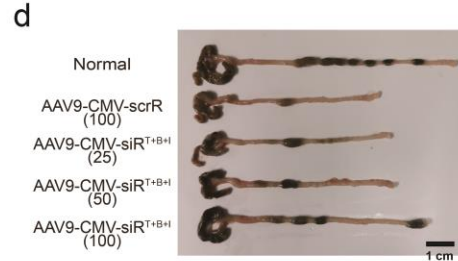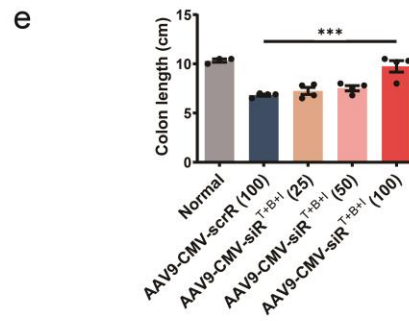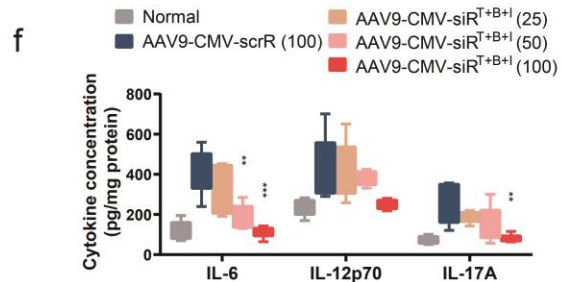

302 **Supplementary Figure 18. Intravenous injection of the AAV9-CMV-siR<sup>T+B+I</sup> induces long-**  
303 **term combination therapy in the DSS-induced chronic UC model. (a)** Flow chart of the  
304 experimental design. **(b)** Body weight curves (n = 4 in each group). **(c)** DAI scores (n = 4 in each  
305 group). **(d)** Representative macroscopic features of colons. Scale bar: 1 cm. **(e)** Mean colon length  
306 (n = 4 in each group). **(f)** Determination of serum levels of IL-6, IL-12p70 and IL-17A by ELISA  
307 (n = 4 in each group). **(g)** Representative images of H&E staining of colon sections. Scale bar: 100  
308  $\mu\text{m}$ . **(h)** Histological scores of colon sections (n = 4 in each group). Values are presented as the  
309 mean  $\pm$  SEM. Significance was determined using one-way ANOVA followed by Dunnett's  
310 multiple comparison in panels c, e, f and h or two-way ANOVA followed by Dunnett's multiple  
311 comparison in panel b. \* p < 0.05; \*\* p < 0.01; \*\*\* p < 0.005.

312

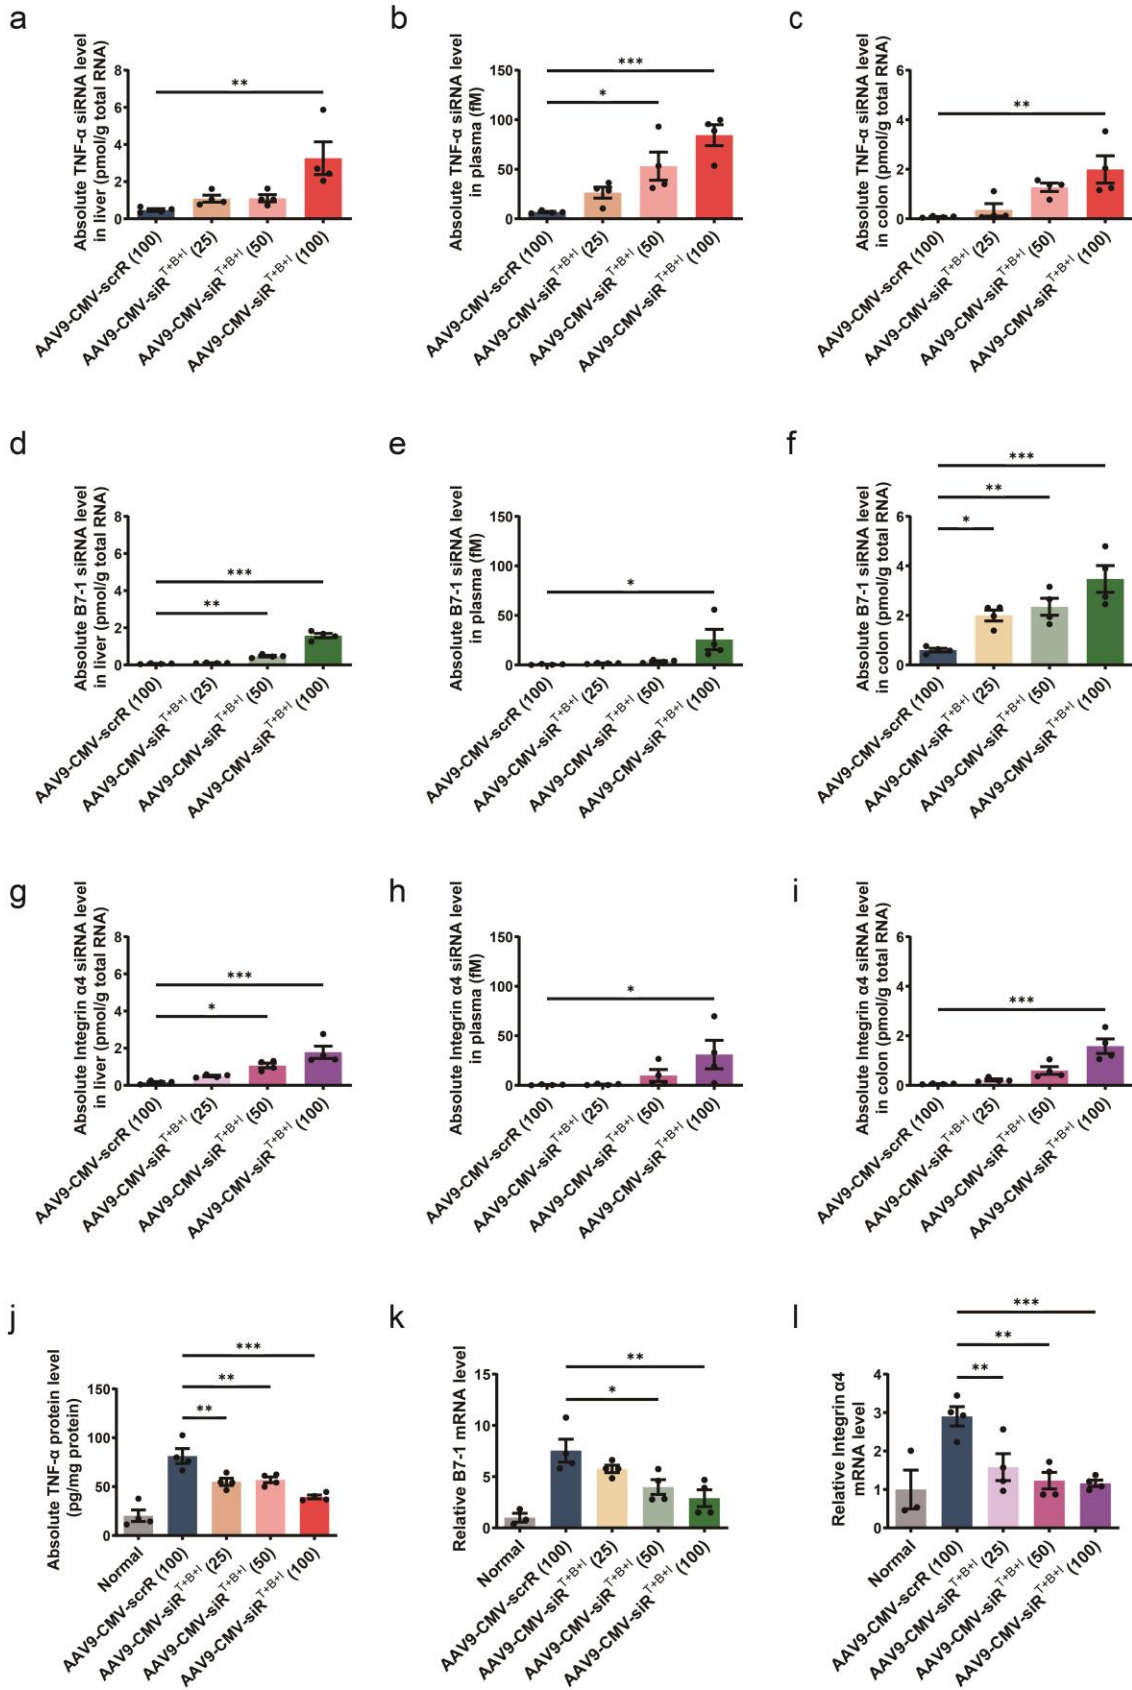

314 **Supplementary Figure 19. Intravenous injection of the AAV9-CMV-siR<sup>T+B+I</sup> results in**  
315 **accumulation of TNF- $\alpha$  siRNA, B7-1 siRNA and integrin  $\alpha$ 4 siRNA *in vivo* and silencing of**  
316 **target genes in the colon. (a-c)** Quantitative RT-PCR analysis of the absolute expression levels of  
317 TNF- $\alpha$  siRNA in the liver, plasma and colon (n = 4 in each group). **(d-f)** Quantitative RT-PCR  
318 analysis of the absolute expression levels of B7-1 siRNA in the liver, plasma and colon (n = 4 in  
319 each group). **(g-i)** Quantitative RT-PCR analysis of the absolute expression levels of integrin  $\alpha$ 4  
320 siRNA in the liver, plasma and colon (n = 4 in each group). **(j)** Determination of the absolute  
321 expression levels of TNF- $\alpha$  protein in the colon by ELISA (n = 4 in each group). **(k and l)**  
322 Quantitative RT-PCR analysis of the relative expression levels of B7-1 mRNA and integrin  $\alpha$ 4  
323 mRNA in the colon (n = 4 in each group). Values are presented as the mean  $\pm$  SEM. Significance  
324 was determined using one-way ANOVA followed by Dunnett's multiple comparison. \* p < 0.05;  
325 \*\* p < 0.01; \*\*\* p < 0.005.  
326



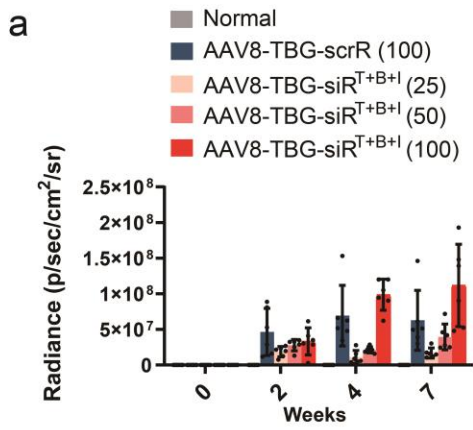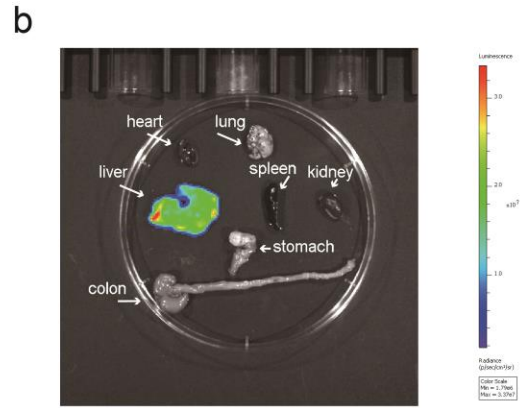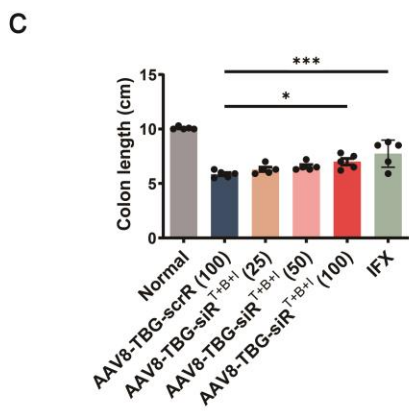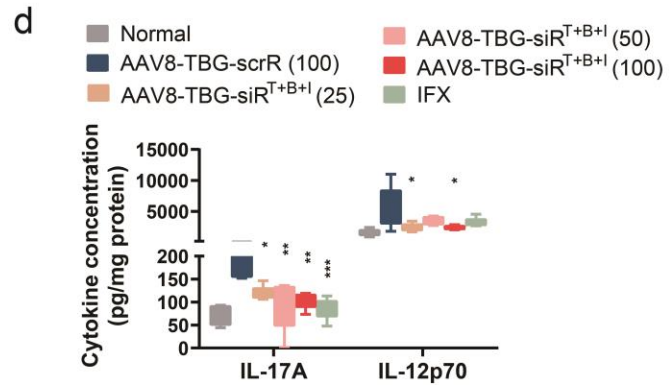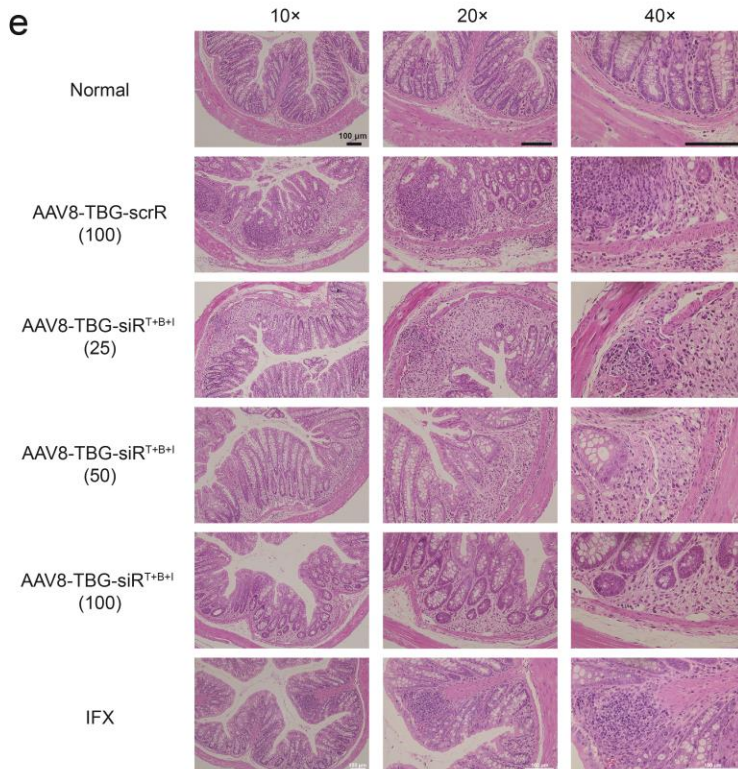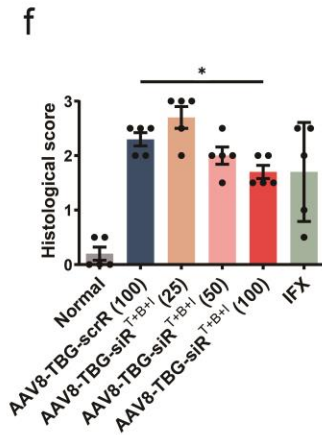

328 **Supplementary Figure 20. Intravenous injection of the AAV8-TBG-siR<sup>T+B+I</sup> induces long-**  
329 **term combination therapy in the DSS-induced chronic UC model. (a)** Evaluation of AAV-  
330 mediated luciferase expression to reflect co-expressed siRNA accumulation *in vivo* (n = 6 in each  
331 group). **(b)** Evaluation of AAV-mediated luciferase expression in various tissues of mice. **(c)** Mean  
332 colon length (n = 5 in each group). **(d)** Determination of serum levels of IL-17A and IL-12p70 by  
333 ELISA (n = 5 in each group). **(e)** Representative images of H&E staining of colon sections. Scale  
334 bar: 100  $\mu$ m. **(f)** Histological scores of colon sections (n = 5 in each group). Values are presented  
335 as the mean  $\pm$  SEM. Significance was determined using one-way ANOVA followed by Dunnett's  
336 multiple comparison. \* p < 0.05; \*\* p < 0.01; \*\*\* p < 0.005.  
337

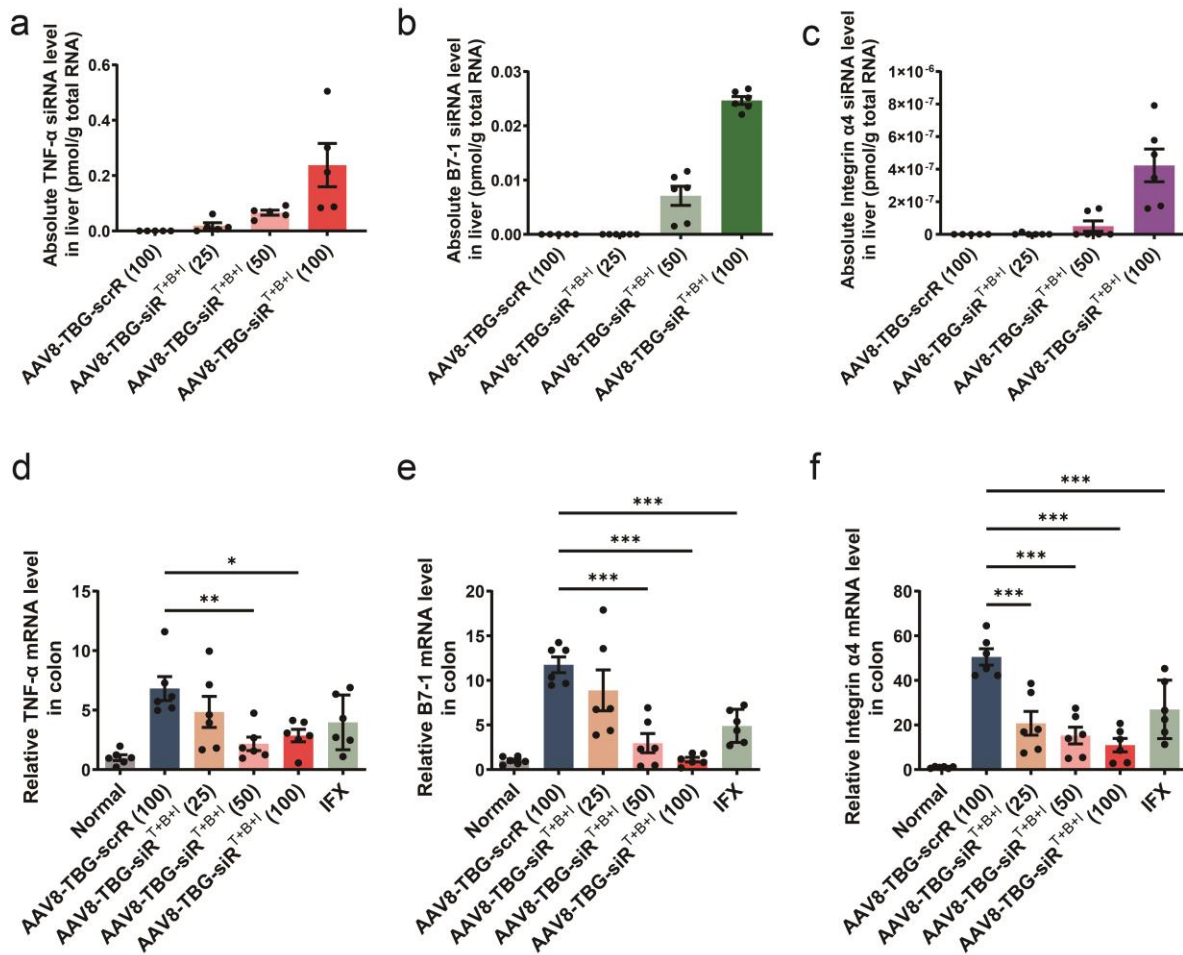

338  
 339 **Supplementary Figure 21. Intravenous injection of the AAV8-TBG-siR<sup>T+B+I</sup> results in**  
 340 **accumulation of TNF- $\alpha$  siRNA, B7-1 siRNA and integrin  $\alpha 4$  siRNA *in vivo* and silencing of**  
 341 **target genes in the colon. (a-c) Quantitative RT-PCR analysis of the absolute expression levels of**  
 342 **TNF- $\alpha$  siRNA, B7-1 siRNA and integrin  $\alpha 4$  siRNA in the liver (n = 6 in each group). (d-f)**  
 343 **Quantitative RT-PCR analysis of the absolute expression levels of TNF- $\alpha$  mRNA, B7-1 mRNA**  
 344 **and integrin  $\alpha 4$  mRNA in the colon (n = 6 in normal, AAV8-TBG-scrR (100), AAV8-TBG-siR<sup>T+B+I</sup>**  
 345 **(25), AAV8-TBG-siR<sup>T+B+I</sup> (50), and AAV8-TBG-siR<sup>T+B+I</sup> (100) groups; n = 5 in IFX group).**  
 346 **Values are presented as the mean  $\pm$  SEM. Significance was determined using one-way ANOVA**  
 347 **followed by Dunnett's multiple comparison. \* p < 0.05; \*\* p < 0.01; \*\*\* p < 0.005.**

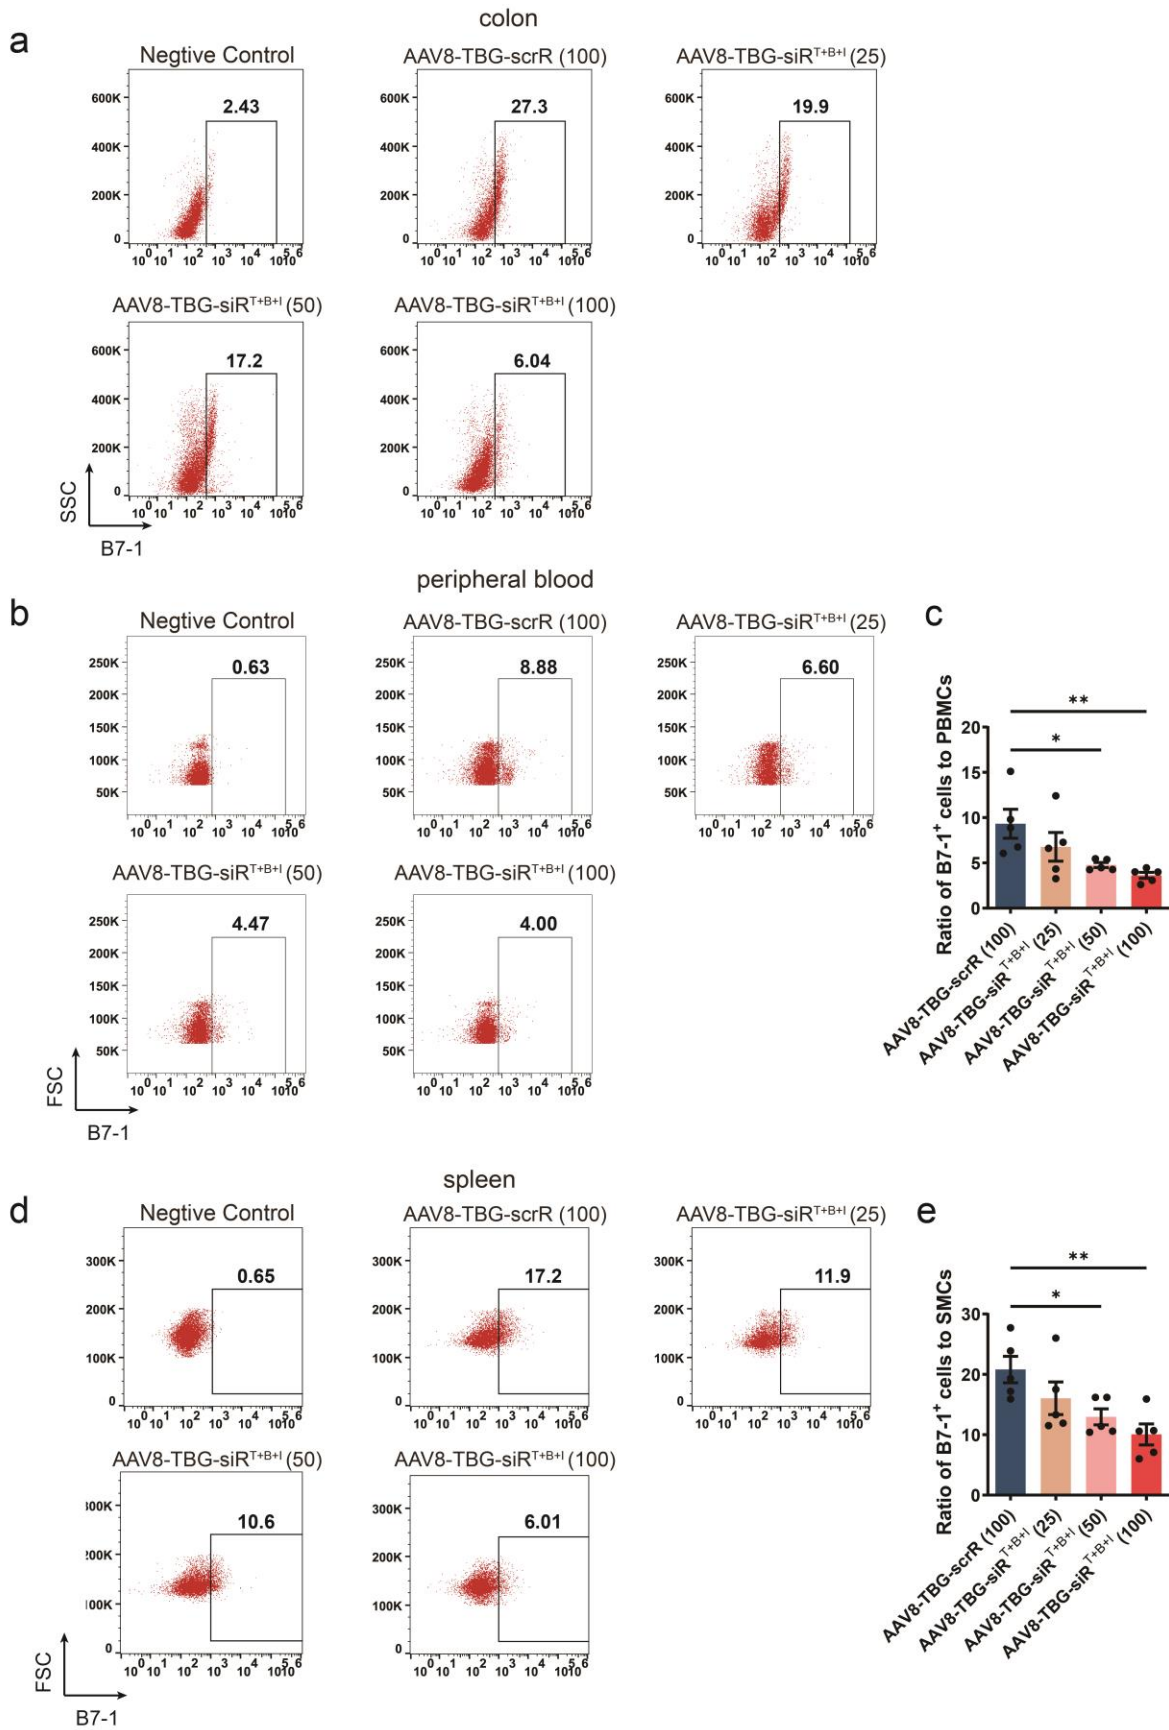

350 **Supplementary Figure 22. Intravenous injection of the AAV8-TBG-siR<sup>T+B+I</sup> results in loss of**  
351 **B7-1 protein on the membrane surface of mononuclear cells. (a)** Representative flow  
352 cytometric plots of B7-1 on the surface of colonic lamina propria mononuclear cells. IgG isotype-  
353 labelled cells was used as a negative control. **(b)** Representative flow cytometric plots of B7-1 on  
354 the surface of peripheral blood mononuclear cells. IgG isotype-labelled cells was used as a negative  
355 control. **(c)** The population of B7-1<sup>+</sup> cells in peripheral blood mononuclear cells (n = 5 in each  
356 group). **(d)** Representative flow cytometric plots of B7-1 on the surface of splenic mononuclear  
357 cells. IgG isotype-labelled cells was used as a negative control. **(e)** The population of B7-1<sup>+</sup> cells  
358 in splenic mononuclear cells (n = 5 in each group). Values are presented as the mean ± SEM.  
359 Significance was determined using one-way ANOVA followed by Dunnett's multiple comparison.  
360 \* p < 0.05; \*\* p < 0.01.  
361

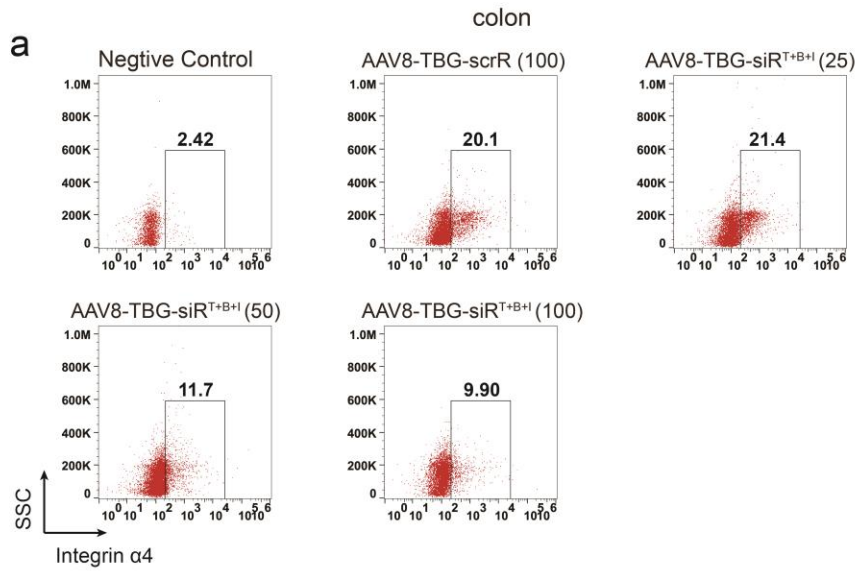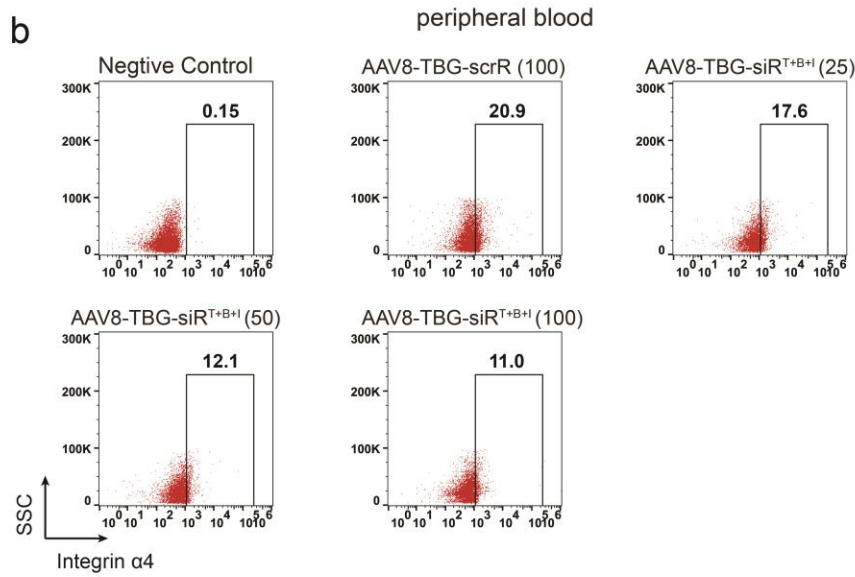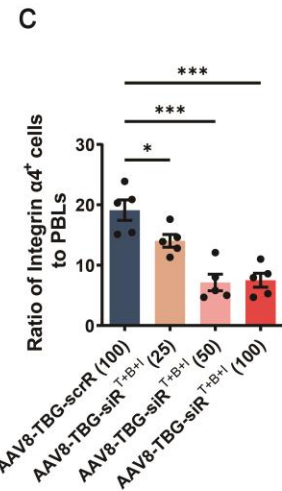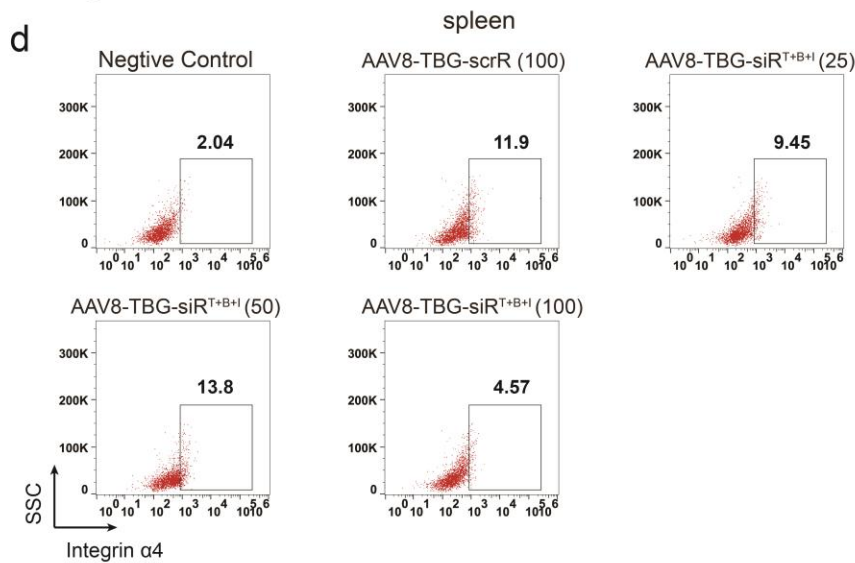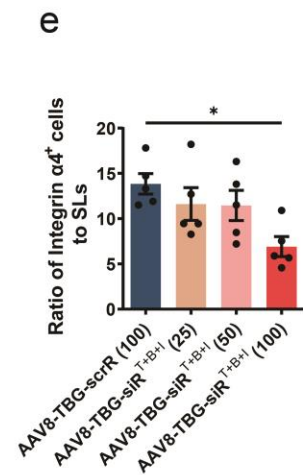

363 **Supplementary Figure 23. Intravenous injection of the AAV8-TBG-siR<sup>T+B+I</sup> results in loss of**  
364 **integrin  $\alpha 4$  protein on the membrane surface of mononuclear cells. (a)** Representative flow  
365 cytometric plots of integrin  $\alpha 4$  on the surface of mononuclear cells derived from the colonic lamina  
366 propria. IgG isotype-labelled cells was used as a negative control. **(b)** Representative flow  
367 cytometric plots of integrin  $\alpha 4$  on the surface of peripheral blood lymphocytes. IgG isotype-  
368 labelled cells was used as a negative control. **(c)** The population of integrin  $\alpha 4^+$  cells in peripheral  
369 blood lymphocytes (n = 5 in each group). **(d)** Representative flow cytometric plots of integrin  $\alpha 4$   
370 on the surface of splenic lymphocytes. IgG isotype-labelled cells was used as a negative control.  
371 **(e)** The population of integrin  $\alpha 4^+$  cells in splenic lymphocytes (n = 5 in each group). Values are  
372 presented as the mean  $\pm$  SEM. Significance was determined using one-way ANOVA followed by  
373 Dunnett's multiple comparison. \* p < 0.05; \*\*\* p < 0.005.  
374

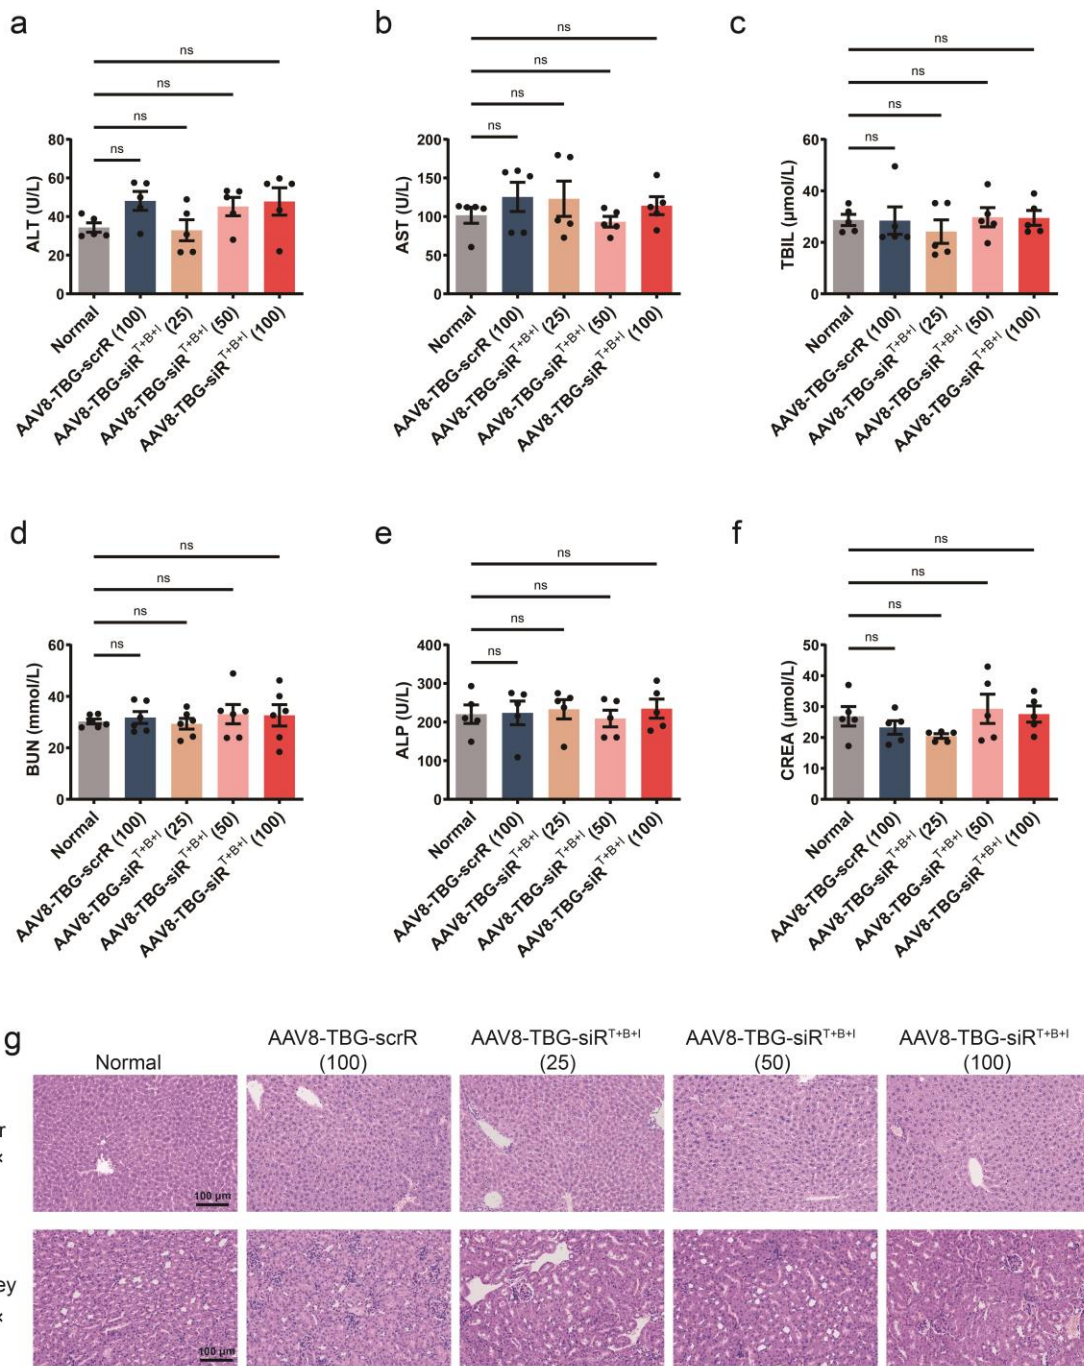



376 **Supplementary Figure 24. Evaluation of the toxic effects and tissue damage in mice after**  
377 **intravenous injection of AAV8-TBG-siR<sup>T+B+I</sup>.** On week 0, BALB/c mice were intravenously  
378 injected with 100  $\mu$ L AAV8-TBG-scrR ( $3.0 \times 10^{12}$  V. G/mL) or 25, 50 or 100  $\mu$ L AAV8-TBG-  
379 siR<sup>T+B+I</sup> ( $3.0 \times 10^{12}$  V. G/mL). At the same time, chronic UC was induced by rhythmically  
380 administering to mice 2.5% DSS for 1 week and water for 2 weeks and the cycle was repeated for  
381 3 times. Untreated BALB/c mice were included as normal controls. After the treatment, mice were  
382 sacrificed, and blood and tissue samples were collected and analysed for serum biochemical  
383 indicators and tissue damage. **(a-f)** Measurement of representative serum biochemical indicators,  
384 including alanine aminotransferase (ALT), aspartate aminotransferase (AST), total bilirubin  
385 (TBIL), blood urea nitrogen (BUN), alkaline phosphatase (ALP) and creatinine (CREA), in the  
386 serum (n = 5 in each group). **(g)** Histological examination of the liver and kidney. Scale bar: 100  
387  $\mu$ m. Values are presented as the mean  $\pm$  SEM. Significance was determined using one-way  
388 ANOVA followed by Dunnett's multiple comparison. NS, not significant.  
389

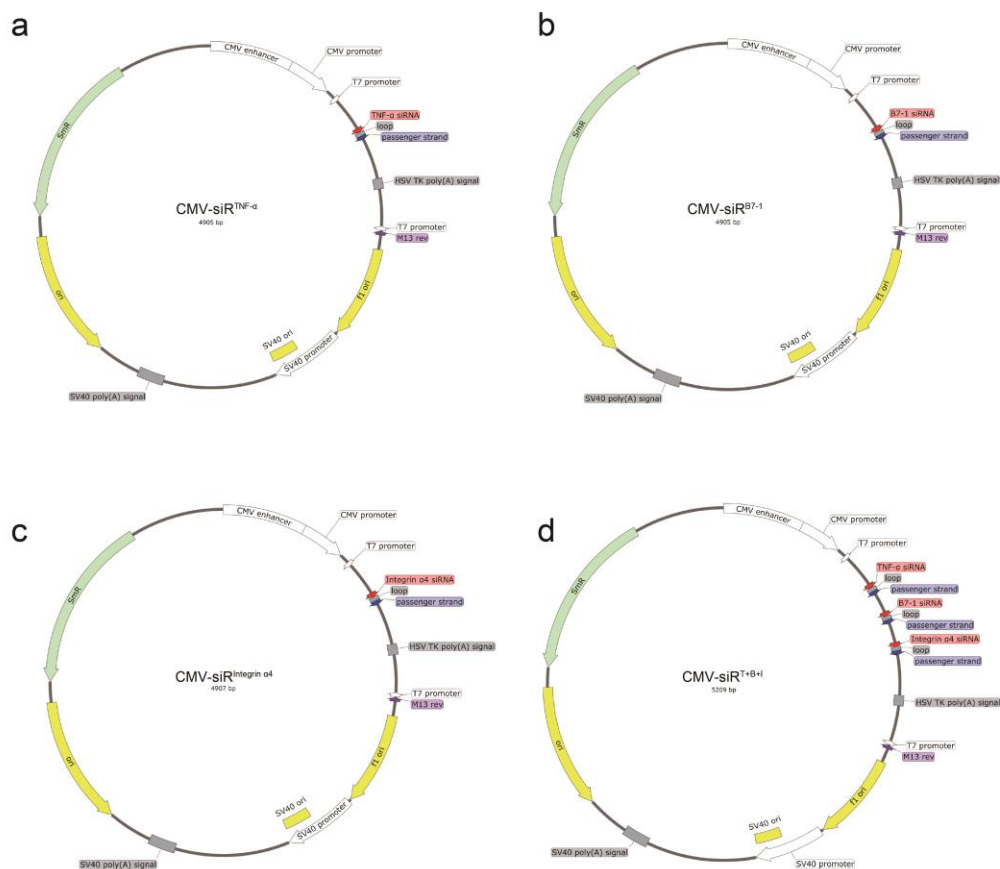

390  
 391 **Supplementary Figure 25. Maps of the plasmids used to express genetic circuits. (a) CMV-**  
 392 **siR<sup>TNF-α</sup> circuit. (b) CMV-siR<sup>B7-1</sup> circuit. (c) CMV-siR<sup>Integrin α4</sup> circuit. (d) CMV-siR<sup>T+B+I</sup> circuit.**

393  
 394

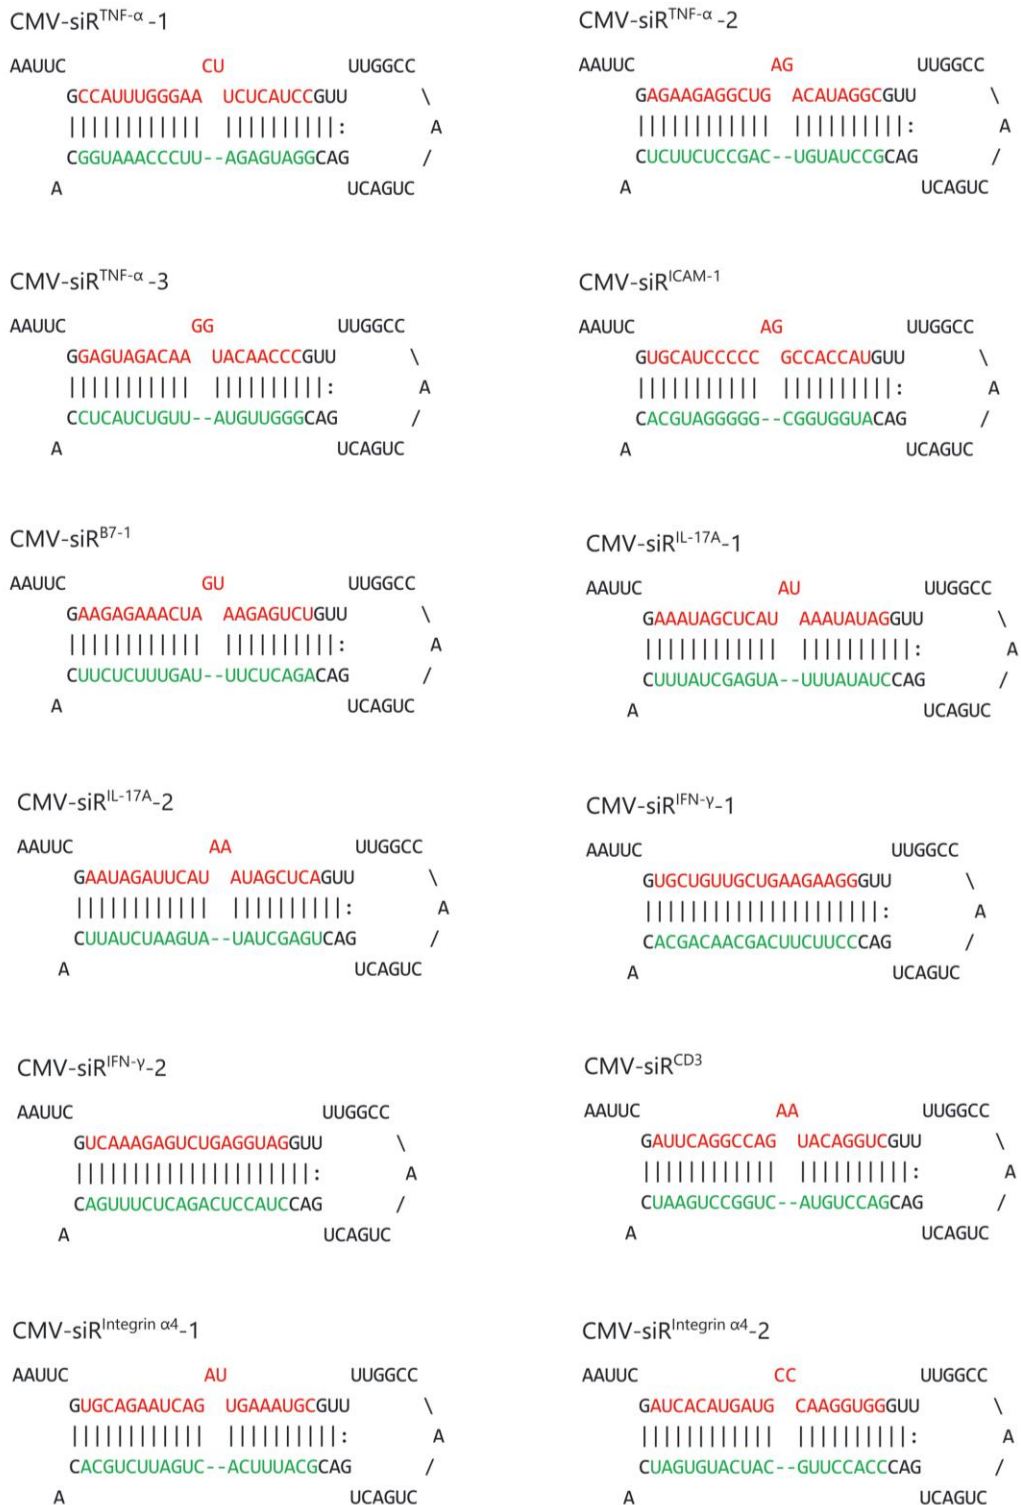

395  
396 **Supplementary Figure 26. Sequences of siRNA expression cassettes.** Sequences of the siRNA  
397 expression cassettes designed for silencing of TNF- $\alpha$ , IL-17A, IFN- $\gamma$ , IL-6, integrin  $\alpha$ 4, ICAM-1,  
398 CD3 and B7-1 are shown. Guide strands are marked in red, and passenger strands are marked in  
399 green.

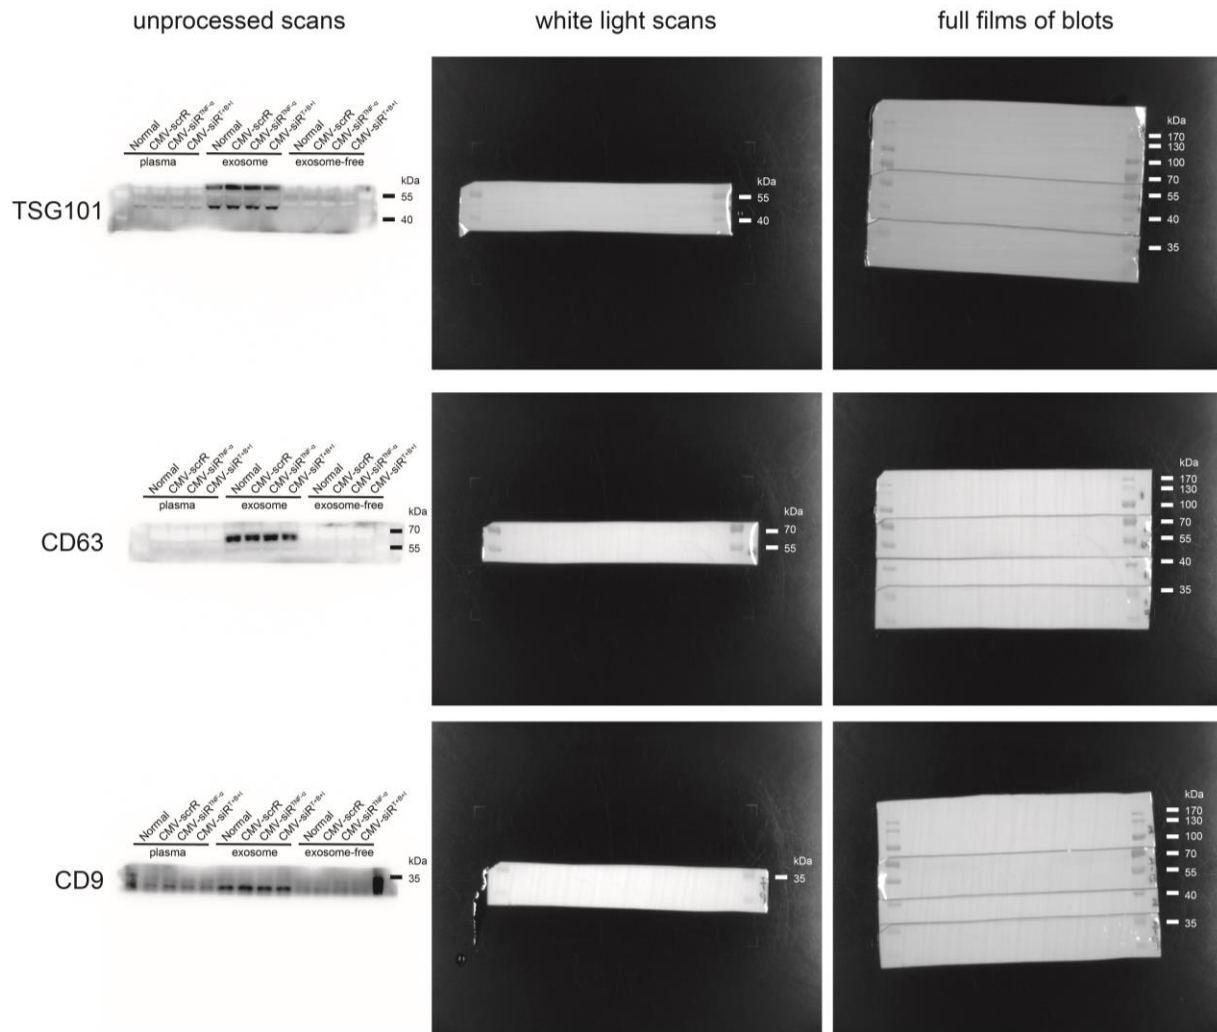

400  
 401 **Supplementary Figure 27. Original Western blot images for Supplementary Figure 4c.**  
 402 Western blot analysis was performed to determine specific sEV markers (TSG101, CD63 and CD9)  
 403 in whole plasma, purified sEVs and sEV-free plasma. An equal amount of total protein was loaded  
 404 in each lane. Whole uncropped images of the original western blots and the raw, unprocessed scans  
 405 are shown.

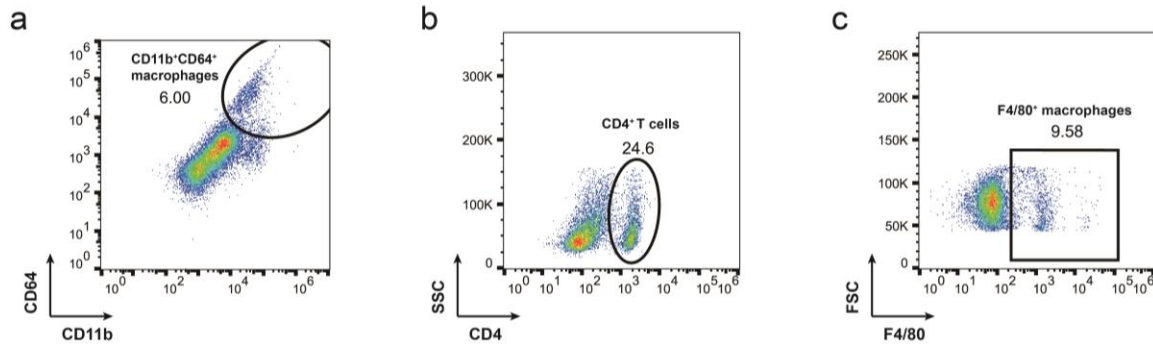

406  
 407 **Supplementary Figure 28. Gating strategy.** (a) Gating strategy to obtain CD11b<sup>+</sup>CD64<sup>+</sup>  
 408 macrophages. Strategy applies to data generated in Figure 5j. (b) Gating strategy to obtain CD4<sup>+</sup> T  
 409 cells. Strategy applies to data generated in Figure 5l, 5n and 8h and Supplementary Figure 14g,  
 410 15a, 15c, 23a, 23b and 23d. (c) Gating strategy to obtain F4/80<sup>+</sup> macrophages. Strategy applies to  
 411 data generated in Figure 8d and Supplementary Figure 13c, 14a, 14c, 22a, 22b and 22d.  
 412

413 **Supplementary Tables**

414 **Supplementary Table 1. Comparison of the therapeutic effects between genetic circuits and**  
 415 **infliximab (IFX).**

416

| Models                                                     | Groups                                | Body weight | Colon length | DAI | Expression of pro-inflammatory cytokines | Pathological evaluation |
|------------------------------------------------------------|---------------------------------------|-------------|--------------|-----|------------------------------------------|-------------------------|
| DSS-induced acute UC model                                 | CMV-siR <sup>TNF-α</sup> vs. IFX      | ≈           | >            | >   | >                                        | <                       |
| TNBS-induced acute colitis model                           | CMV-siR <sup>TNF-α</sup> vs. IFX      | >           | >            | >   | \                                        | \                       |
| DSS-induced chronic UC model                               | CMV-siR <sup>TNF-α</sup> vs. IFX      | >           | >            | >   | >                                        | >                       |
| TNBS-induced chronic colitis model                         | CMV-siR <sup>TNF-α</sup> vs. IFX      | >           | ≈            | >   | >                                        | >                       |
| IL-10 <sup>-/-</sup> mice with spontaneous chronic colitis | CMV-siR <sup>TNF-α</sup> vs. IFX      | ≈           | >            | \   | >                                        | <                       |
| IL-10 <sup>-/-</sup> mice with spontaneous chronic colitis | CMV-siR <sup>T+B+1</sup> vs. IFX      | ≈           | >            | \   | >                                        | >                       |
| DSS-induced chronic UC model                               | AAV8-TBG-siR <sup>T+B+1</sup> vs. IFX | ≈           | >            | >   | ≈                                        | ≈                       |

417 >: Plasmid-based or AAV-driven genetic circuits perform better than IFX.

418 <: Plasmid-based or AAV-driven genetic circuits perform worse than IFX.

419 ≈: Plasmid-based or AAV-driven genetic circuits perform same as IFX.

420 \: not available.

421

422 **Supplementary Table 2. Sequences of the siRNAs designed for silencing of TNF- $\alpha$ , IL-17A,**  
 423 **INF- $\gamma$ , IL-6, integrin  $\alpha$ 4, ICAM-1, CD3 and B7-1.**

424

| Name                                               | siRNA sequences (5' - 3') |
|----------------------------------------------------|---------------------------|
| CMV-siR <sup>TNF-<math>\alpha</math>-1</sup>       | CCATTTGGGAACTTCTCATCC     |
| CMV-siR <sup>TNF-<math>\alpha</math>-2</sup>       | AGAAGAGGCTGAGACATAGGC     |
| CMV-siR <sup>TNF-<math>\alpha</math>-3</sup>       | GAGTAGACAAGGTACAACCC      |
| CMV-siR <sup>ICAM-1</sup>                          | TGCATCCCCCAGGCCACCAT      |
| CMV-siR <sup>B7-1</sup>                            | AAGAGAACTAGTAAGAGTCT      |
| CMV-siR <sup>IL-17A-1</sup>                        | AAATAGCTCATATAAATATAG     |
| CMV-siR <sup>IL-17A-2</sup>                        | AATAGATTCATAAATAGCTCA     |
| CMV-siR <sup>IFN-<math>\gamma</math>-1</sup>       | TGCTGTTGCTGAAGAAGG        |
| CMV-siR <sup>IFN-<math>\gamma</math>-2</sup>       | TCAAAGAGTCTGAGGTAG        |
| CMV-siR <sup>IL-6</sup>                            | AGAGCAGAATGAGCTACAGAC     |
| CMV-siR <sup>CD3</sup>                             | ATTCAGGCCAGAATACAGGTC     |
| CMV-siR <sup>Integrin <math>\alpha</math>4-1</sup> | TGCAGAATCAGATTGAAATGC     |
| CMV-siR <sup>Integrin <math>\alpha</math>4-2</sup> | ATCACATGATGCCCAAGGTGG     |

425

426

427 **Supplementary Table 3. Primer sequences.**

| Name                          | Primer sequences (5' - 3') |
|-------------------------------|----------------------------|
| TNF- $\alpha$ (forward)       | CAGGCGGTGCCTATGTCTC        |
| TNF- $\alpha$ (reverse)       | CGATCACCCCGAAGTTCAGTAG     |
| B7-1 (forward)                | TCCTGGGCCTGGTCCTTTCA       |
| B7-1 (reverse)                | GGGAAACCCCGGAAGCAA         |
| Integrin $\alpha$ 4 (forward) | GCCAACCGTCGCATCCTGTG       |
| Integrin $\alpha$ 4 (reverse) | TCGGTCTGCACCTCGCTTCC       |
| ICAM-1 (forward)              | CTGGCAGCAAGTAGGCAAGGAC     |
| ICAM-1 (reverse)              | TGGCTGGCGGCTCAGTATCTC      |
| IFN- $\gamma$ (forward)       | CAGGCCATCAGCAACAACATAAGC   |
| IFN- $\gamma$ (reverse)       | AGCTGGTGGACCACTCGGATG      |
| IL-6 (forward)                | AGGAGTGGCTAAGGACCAAGACC    |
| IL-6 (reverse)                | CTGACCACAGTGAGGAATGTCCAC   |
| CD3 (forward)                 | GTCTGCGTCTGGTGCCTTCTTC     |
| CD3 (reverse)                 | CGGCATCGTCCTGGCAAGTG       |
| IL-17A (forward)              | TGATGCTGTTGCTGCTGCTGAG     |
| IL-17A (reverse)              | TGGAACGGTTGAGGTAGTCTGAGG   |
| GAPDH (forward)               | GATATTGTTGCCATCAATGAC      |
| GAPDH (reverse)               | TTGATTTTGGAGGGATCTCG       |

428

429
